# Supplementary material for: Microbiota plasticity in tilapia gut revealed by meta-analysis evaluating the effect of probiotics, prebiotics, and biofloc
Source: PeerJ. 2023 Oct 11;11:e16213. doi: 10.7717/peerj.16213 (PMC10576497; doi:10.7717/peerj.16213)
Supplement: Supplemental Information 5 [file peerj-11-16213-s005.xlsx]

## Sheet: Tilapia - meta-analisis Mar (2)
Author	Year	Title	Journal	Doi
Adeoye, A. A., Yomla, R., Jaramillo-Torres, A., Rodiles, A., Merrifield, D. L. and Davies, S. J	2016	Combined effects of exogenous enzymes and probiotic on Nile tilapia (Oreochromis niloticus) growth, intestinal morphology and microbiome.	Aquaculture. 463, 61-70.	10.1016/j.aquaculture.2016.05.028
Aryati, Y., Widanarni, W., Wahjuningrum, D., Rusmana, I. and Lusiastuti, A. M	2021	The effect of dietary honey prebiotic on microbiota diversity in the digestive tract of Nile tilapia (Oreochromis niloticus) and its growth performance.	Aquaculture Research. 52(3), 1215-1226.	10.1111/are.14980
das Neves, S. C. V., da Silva, S., Costa, G. K. A., Correia, E. S., Santos, A. L., da Silva, L. C. R. and Bicudo, A. J. A	2022	Dietary Supplementation with Fumaric Acid Improves Growth Performance in Nile Tilapia Juveniles.	Animals.	10.3390/ani12010008
de Mello, H., Moraes, J. R. E., Niza, I. G., de Moraes, F. R., Ozorio, R. O. A., Shimada, M. T., Engracia, J. R. and Claudiano, G. S	2013	Beneficial effects of probiotics on the intestine of juvenile Nile tilapia.	Pesquisa Veterinaria Brasileira. 33(6), 724-730.	10.1590/s0100-736x2013000600006
de Moraes, A. V., Owatari, M. S., da Silva, E., Pereira, M. D., Piola, M., Ramos, C., Farias, D. R., Schleder, D. D., Jesus, G. F. A. and Jatoba, A	2022	Effects of microencapsulated probiotics-supplemented diet on growth, non-specific immunity, intestinal health and resistance of juvenile Nile tilapia challenged with Aeromonas hydrophila.	Animal Feed Science and Technology. 287.	10.1016/j.anifeedsci.2022.115286
de Souza, F. P., de Lima, E. C. S., Pandolfi, V. C. F., Leite, N. G., Furlan-Murari, P. J., Leal, C. N. S., Mainardi, R. M., Suphoronski, S. A., Favero, L. M., Koch, J. F. A., Pereira, U. D. and Lopera-Barrero, N. M	2020	Effect of beta-glucan in water on growth performance, blood status and intestinal microbiota in tilapia under hypoxia.	Aquaculture Reports. 17.	10.1016/j.aqrep.2020.100369
Del'Duca, A., Cesar, D. E., Diniz, C. G. and Abreu, P. C	2013	Evaluation of the presence and efficiency of potential probiotic bacteria in the gut of tilapia (Oreochromis niloticus) using the fluorescent in situ hybridization technique.	Aquaculture. 388, 115-121.	10.1016/j.aquaculture.2013.01.019
Deng, Y. L., Borewicz, K., van Loo, J., Olabarrieta, M. Z., Kokou, F., Sipkema, D. and Verdegem, M. C. J	2022	In-Situ Biofloc Affects the Core Prokaryotes Community Composition in Gut and Enhances Growth of Nile Tilapia (Oreochromis niloticus).	Microbial Ecology. 84(3), 879-892.	10.1007/s00248-021-01880-y
Deng, Y. L., Kokou, F., Eding, E. H. and Verdegem, M. C. J	2021	Impact of early-life rearing history on gut microbiome succession and performance of Nile tilapia.	Animal Microbiome. 3(1).	10.1186/s42523-021-00145-w
Deng, Y. L., Verdegem, M. C. J., Eding, E. and Kokou, F	2022	Effect of rearing systems and dietary probiotic supplementation on the growth and gut microbiota of Nile tilapia (Oreochromis niloticus) larvae.	Aquaculture. 546.	10.1016/j.aquaculture.2021.737297
Ferguson, R. M. W., Merrifield, D. L., Harper, G. M., Rawling, M. D., Mustafa, S., Picchietti, S., Balcazar, L. and Davies, S. J	2010	The effect of Pediococcus acidilactici on the gut microbiota and immune status of on-growing red tilapia (Oreochromis niloticus).	Journal of Applied Microbiology. 109(3), 851-862.	10.1111/j.1365-2672.2010.04713.x
Foysal, M. J., Alam, M., Kawser, A., Hasan, F., Rahman, M. M., Tay, C. Y., Prodhan, M. S. H. and Gupta, S. K	2020	Meta-omits technologies reveals beneficiary effects of Lactobacillus plantarum as dietary supplements on gut microbiota, immune response and disease resistance of Nile tilapia (Oreochromis niloticus).	Aquaculture. 520.	10.1016/j.aquaculture.2020.734974
Giatsis, C., Sipkema, D., Ramiro-Garcia, J., Bacanu, G. M., Abernathy, J., Verreth, J., Smidt, H. and Verdegem, M	2016	Probiotic legacy effects on gut microbial assembly in tilapia larvae.	Scientific Reports. 6.	10.1038/srep33965
Giorgia, G., Elia, C., Andrea, P., Cinzia, C., Stefania, S., Ana, R., Daniel, M. L., Ike, O. and Oliana, C	2018	Effects of Lactogen 13, a New Probiotic Preparation, on Gut Microbiota and Endocrine Signals Controlling Growth and Appetite of Oreochromis niloticus Juveniles.	Microbial Ecology. 76(4), 1063-1074.	10.1007/s00248-018-1177-1
Guimaraes, M. C., Cerezo, I. M., Fernandez-Alarcon, M. F., Natori, M. M., Sato, L. Y., Kato, C. A. T., Morinigo, M. A., Tapia-Paniagua, S., Dias, D. D., Ishikawa, C. M., Ranzani-Paiva, M. J. T., Cassiano, L. L., Bach, E. E., Clissa, P. B., Orefice, D. P. and Tachibana, L	2022	Oral Administration of Probiotics (Bacillus subtilis and Lactobacillus plantarum) in Nile Tilapia (Oreochromis niloticus) Vaccinated and Challenged with Streptococcus agalactiae.	Fishes. 7(4)	10.3390/fishes7040211
Guimaraes, M. C., Guimaraes, A., Natori, M. M., Alarcon, M. F. F., Dias, D. D., Ishikawa, C. M., Tapia-Paniagua, S., Morinigo, M. A., Moyano, F. J. and Tachibana, L	2021	Oral administration of Bacillus subtilis and Lactobacillus plantarum modulates the gut microbiota and increases the amylase activity of Nile tilapia (Oreochromis niloticus).	Aquaculture International. 29(1), 91-104.	10.1007/s10499-020-00612-2
Hassaan, M. S., Mohammady, E. Y., Soaudy, M. R., Palma, J., Shawer, E. E. and El-Haroun, E	2020	The effect of dietary sericite on growth performance, digestive enzymes activity, gut microbiota and haematological parameters of Nile tilapia, Oreochromis niloticus (L.) fingerlings.	Animal Feed Science and Technology. 262.	10.1016/j.anifeedsci.2020.114400
Hortillosa, E. M., Amar, M. J. A., Nunal, S. N., Pedroso, F. L. and Ferriols, V	2022	Effects of putative dietary probiotics from the gut of milkfish (Chanos chanos) on the growth performance and intestinal enzymatic activities of juvenile Nile tilapia (Oreochromis niloticus	Aquaculture Research. 53(1), 98-108.	10.1111/are.15556
Hossain, M. K., Islam, S. M. M., Rafiquzzaman, S. M., Nuruzzaman, M., Hossain, M. T. and Shahjahan, M	2022	Multi-species probiotics enhance growth of Nile tilapia (Oreochromis niloticus) through upgrading gut, liver and muscle health.	Aquaculture Research. 53(16), 5710-5719.	10.1111/are.16052
Hu, J., Ran, C., He, S. X., Cao, Y. A., Yao, B., Ye, Y. T., Zhang, X. Z. and Zhou, Z. G	2016	Dietary microbial phytase exerts mixed effects on the gut health of tilapia: a possible reason for the null effect on growth promotion.	British Journal of Nutrition. 115(11), 1958-1966.	10.1017/s0007114516001240
Jatoba, A., Vieira, F. D., Buglione-Neto, C. C., Mourino, J. L. P., Silva, B. C., Seiftter, W. Q. and Andreatta, E. R	2011	Diet supplemented with probiotic for Nile tilapia in polyculture system with marine shrimp.	Fish Physiology and Biochemistry. 37(4), 725-732.	10.1007/s10695-011-9472-5
Koh, C. B., Romano, N., Zahrah, A. S. and Ng, W. K	2016	Effects of a dietary organic acids blend and oxytetracycline on the growth, nutrient utilization and total cultivable gut microbiota of the red hybrid tilapia, Oreochromis sp., and resistance to Streptococcus agalactiae.	Aquaculture Research. 47(2), 357-369.	10.1111/are.12492
Kord, M. I., Maulu, S., Srour, T. M., Omar, E. A., Farag, A. A., Nour, A. A. M., Hasimuna, O. J., Abdel-Tawwab, M. and Khalil, H. S	2022	Impacts of water additives on water quality, production efficiency, intestinal morphology, gut microbiota, and immunological responses of Nile tilapia fingerlings under a zero-water-exchange system.	Aquaculture. 547.	10.1016/j.aquaculture.2021.737503
Kuebutornye, F. K. A., Wang, Z. W., Lu, Y. S., Abarike, E. D., Sakyi, M. E., Li, Y., Xie, C. X. and Hlordzi, V	2020	Effects of three host-associated Bacillus species on mucosal immunity and gut health of Nile tilapia, Oreochromis niloticus and its resistance against Aeromonas hydrophila infection.	Fish & Shellfish Immunology. 97, 83-95.	10.1016/j.fsi.2019.12.046
Li, J. W., Liu, G., Li, C. W., Deng, Y. L., Tadda, M. A., Lan, L. H., Zhu, S. M. and Liu, D. Z	2018	Effects of different solid carbon sources on water quality, biofloc quality and gut microbiota of Nile tilapia (Oreochromis niloticus) larvae.	Aquaculture. 495, 919-931.	10.1016/j.aquaculture.2018.06.078
Li, L., Song, J. J., Peng, C. Y., Yang, Z. C., Wang, L., Lin, J. C., Li, L. B., Huang, Z. C. and Gong, B	2022	Co-occurrence network of microbes linking growth and immunity parameters with the gut microbiota in Nile tilapia (Oreochromis niloticus) after feeding with fermented soybean meal.	Aquaculture Reports. 26.	10.1016/j.aqrep.2022.101280
Liao, Q. Z., Zhen, Y. T., Qin, Y., Jiang, Q., Lan, T. C., Huang, L. D. and Shen, P. H	2022	Effects of dietary Metschnikowia sp. GXUS03 on growth, immunity, gut microbiota and Streptococcus agalactiae resistance of Nile tilapia (Oreochromis niloticus).	Aquaculture Research. 53(5), 1918-1927.	10.1111/are.15720
Liu, G., Deng, Y. L., Verdegem, M., Ye, Z. Y. and Zhu, S. M	2019	Using poly(beta-hydroxybutyrate-beta-hydroxyvalerate) as carbon source in biofloc-systems: Nitrogen dynamics and shift of Oreochromis niloticus gut microbiota.	Science of the Total Environment. 694.	10.1016/j.scitotenv.2019.133664
Liu, W. S., Wang, W. W., Ran, C., He, S. X., Yang, Y. L. and Zhou, Z. G	2017	Effects of dietary scFOS and lactobacilli on survival, growth, and disease resistance of hybrid tilapia.	Aquaculture. 470, 50-55.	10.1016/j.aquaculture.2016.12.013
Maas, R. M., Deng, Y. L., Dersjant-Li, Y., Petit, J., Verdegem, M. C. J., Schrama, J. W. and Kokou, F	2021	Exogenous enzymes and probiotics alter digestion kinetics, volatile fatty acid content and microbial interactions in the gut of Nile tilapia.	Scientific Reports. 11(1).	10.1038/s41598-021-87408-3
Meenakshisundaram, M., Sugantham, F., Muthukumar, C. and Chandrasekar, M. S	2021	Metagenomic characterization of biofloc in the grow-out culture of Genetically Improved Farmed Tilapia (GIFT).	Aquaculture Research. 52(9), 4249-4262.	10.1111/are.15263
Melo-Bolivar, J. F., Pardo, R. Y. R., Junca, H., Sidjabat, H. E., Cano-Lozano, J. A. and Diaz, L. M. V	2022	Competitive Exclusion Bacterial Culture Derived from the Gut Microbiome of Nile Tilapia (Oreochromis niloticus) as a Resource to Efficiently Recover Probiotic Strains: Taxonomic, Genomic, and Functional Proof of Concept.	Microorganisms. 10(7).	10.3390/microorganisms10071376
Melo-Bolivar, J. F., Pardo, R. Y. R., Quintanilla-Carvajal, M. X., Diaz, L. E., Hume, M. E. and Villamil, L	2023	Development of a Nile tilapia (Oreochromis niloticus) gut microbiota-derived bacterial consortium with antibacterial activity against fish pathogens.	Innovative Food Science & Emerging Technologies. 83.	10.1016/j.ifset.2022.103214
Merrifield, D. L., Balcazar, J. L., Daniels, C., Zhou, Z. G., Carnevali, O., Sun, Y. Z., Hoseinifar, S. H. and Ringo, E	2014	Indigenous Lactic Acid Bacteria in Fish and Crustaceans, Aquaculture Nutrition: Gut Health, Probiotics and Prebiotics.	Aquaculture Nutrition. 6, 128-168.	10.1002/9781118897263.ch6
Minich, J. J., Zhu, Q. Y., Xu, Z. Z., Amir, A., Ngochera, M., Simwaka, M., Allen, E. E., Zidana, H. and Knight, R	2018	Microbial effects of livestock manure fertilization on freshwater aquaculture ponds rearing tilapia (Oreochromis shiranus) and North African catfish (Clarias gariepinus).	Microbiologyopen. 7(6).	10.1002/mbo3.716
Opiyo, M. A., Jumbe, J., Ngugi, C. C. and Charo-Karisa, H	2019	Dietary administration of probiotics modulates non-specific immunity and gut microbiota of Nile tilapia (Oreochromis niloticus) cultured in low input ponds.	International Journal of Veterinary Science and Medicine. 7(1), 1-9.	10.1080/23144599.2019.1624299
Peredo, A. M., Buentello, A., Gatlin, D. M. and Hume, M. E	2015	Evaluation of a Dairy-Yeast Prebiotic in the Diet of Juvenile Nile Tilapia, Oreochromis niloticus.	Journal of the World Aquaculture Society. 46(1), 92-101.	10.1111/jwas.12170
Poolsawat, L., Li, X. Q., He, M., Ji, D. and Leng, X. J	2020	Clostridium butyricum as probiotic for promoting growth performance, feed utilization, gut health and microbiota community of tilapia (Oreochromis niloticus x O. aureus).	Aquaculture Nutrition. 26(3), 657-670.	10.1111/anu.13025
Ran, C., Hu, J., Liu, W. S., Liu, Z., He, S. X., Dan, B. C. T., Diem, N. N., Ooi, E. L. and Zhou, Z. G	2016	Thymol and Carvacrol Affect Hybrid Tilapia through the Combination of Direct Stimulation and an Intestinal Microbiota-Mediated Effect: Insights from a Germ-Free Zebrafish Model.	Journal of Nutrition. 146(5), 1132-1140.	10.3945/jn.115.229377
Ran, C., Huang, L., Hu, J., Tacon, P., He, S. X., Li, Z. M., Wang, Y. B., Liu, Z., Xu, L., Yang, Y. L. and Zhou, Z. G	2016	Effects of dietary live and heat-inactive baker's yeast on growth, gut health, and disease resistance of Nile tilapia under high rearing density.	Fish & Shellfish Immunology. 56, 263-271.	10.1016/j.fsi.2016.07.001
Ran, C., Huang, L., Liu, Z., Xu, L., Yang, Y. L., Tacon, P., Auclair, E. and Zhou, Z. G	2015	A Comparison of the Beneficial Effects of Live and Heat-Inactivated Baker's Yeast on Nile Tilapia: Suggestions on the Role and Function of the Secretory Metabolites Released from the Yeast.	Plos One. 10(12).	10.1371/journal.pone.0145448
Reda, R. M., Mahmoud, R., Selim, K. M. and El-Araby, I. E	2016	Effects of dietary acidifiers on growth, hematology, immune response and disease resistance of Nile tilapia, Oreochromis niloticus.	Fish & Shellfish Immunology. 50, 255-262.	10.1016/j.fsi.2016.01.040
Standen, B. T., Rodiles, A., Peggs, D. L., Davies, S. J., Santos, G. A. and Merrifield, D. L	2015	Modulation of the intestinal microbiota and morphology of tilapia, Oreochromis niloticus, following the application of a multi-species probiotic.	Applied Microbiology and Biotechnology. 99(20), 8403-8417.	10.1007/s00253-015-6702-2
Tabassum, T., Mahamud, A., Acharjee, T. K., Hassan, R., Snigdha, T. A., Islam, T., Alam, R., Khoiam, M. U., Akter, F., Azad, M. R., Al Mahamud, M. A., Ahmed, G. U. and Rahman, T	2021	Probiotic supplementations improve growth, water quality, hematology, gut microbiota and intestinal morphology of Nile tilapia.	Aquaculture Reports. 21.	10.1016/j.aqrep.2021.100972
Tachibana, L., Telli, G. S., Dias, D. D., Goncalves, G. S., Guimaraes, M. C., Ishikawa, C. M., Cavalcante, R. B., Natori, M. M., Alarcon, M. F. F., Tapia-Paniagua, S., Morinigo, M. A., Moyano, F. J. and Ranzani-Paiva, M. J. T	2021	Bacillus subtilis and Bacillus licheniformis in diets for Nile tilapia (Oreochromis niloticus): Effects on growth performance, gut microbiota modulation and innate immunology.	Aquaculture Research. 52(4), 1630-1642.	10.1111/are.15016
Tan, H. Y., Chen, S. W. and Hu, S. Y	2019	Improvements in the growth performance, immunity, disease resistance, and gut microbiota by the probiotic Rummeliibacillus stabekisii in Nile tilapia (Oreochromis niloticus).	Fish & Shellfish Immunology. 92, 265-275.	10.1016/j.fsi.2019.06.027
Tang, S. S., Liu, S. B., Zhang, J. S., Zhou, L., Wang, X. D., Zhao, Q., Weng, W. M., Qin, J. G., Chen, L. Q. and Li, E. C	2020	Relief of hypersaline stress in Nile tilapia Oreochromis niloticus by dietary supplementation of a host-derived Bacillus subtilis strain.	Aquaculture. 528.	10.1016/j.aquaculture.2020.735542
Wang, M., Liu, G. B., Lu, M. X., Ke, X. L., Liu, Z. G., Gao, F. Y., Cao, J. M., Zhu, H. P., Yi, M. M. and Yu, D. G	2017	Effect of Bacillus cereus as a water or feed additive on the gut microbiota and immunological parameters of Nile tilapia.	Aquaculture Research. 48(6), 3163-3173.	10.1111/are.13146
Wang, M., Yi, M. M., Lu, M. X., Gao, F. Y., Liu, Z. G., Huang, Q. B., Li, Q. Y. and Zhu, D. X	2020	Effects of probiotics Bacillus cereus NY5 and Alcaligenes faecalis Y311 used as water additives on the microbiota and immune enzyme activities in three mucosal tissues in Nile tilapia Oreochromis niloticus reared in outdoor tanks.	Aquaculture Reports. 17.	10.1016/j.aqrep.2020.100309
Wang, T., Wu, H. X., Li, W. J., Xu, R., Qiao, F., Du, Z. Y. and Zhang, M. L	2022	Effects of dietary mannan oligosaccharides (MOS) supplementation on metabolism, inflammatory response and gut microbiota of juvenile Nile tilapia (Oreochromis niloticus) fed with high carbohydrate diet.	Fish & Shellfish Immunology. 130, 550-559.	10.1016/j.fsi.2022.09.052
Wu, P. S., Liu, C. H. and Hu, S. Y	2021	Probiotic Bacillus safensis NPUST1 Administration Improves Growth Performance, Gut Microbiota, and Innate Immunity against Streptococcus iniae in Nile tilapia (Oreochromis niloticus).	Microorganisms. 9(12),	10.3390/microorganisms9122494
Xia, Y., Cao, J. M., Wang, M., Lu, M. X., Chen, G., Gao, F. Y., Liu, Z. G., Zhang, D. F., Ke, X. L. and Yi, M. M	2019	Effects of Lactococcus lactis subsp. lactis JCM5805 on colonization dynamics of gut microbiota and regulation of immunity in early ontogenetic stages of tilapia.	Fish & Shellfish Immunology. 86, 53-63.	10.1016/j.fsi.2018.11.022
Xia, Y., Lu, M. X., Chen, G., Cao, J. M., Gao, F. Y., Wang, M., Liu, Z. G., Zhang, D. F., Zhu, H. P. and Yi, M. M	2018	Effects of dietary Lactobacillus rhamnosus JCM1136 and Lactococcus lactis subsp lactis JCM5805 on the growth, intestinal microbiota, morphology, immune response and disease resistance of juvenile Nile tilapia, Oreochromis niloticus.	Fish & Shellfish Immunology. 76, 368-379.	10.1016/j.fsi.2018.03.020
Xu, C., Suo, Y. T., Wang, X. D., Qin, J. G., Chen, L. Q. and Li, E. C	2020	Recovery from Hypersaline-Stress-Induced Immunity Damage and Intestinal-Microbiota Changes through Dietary beta-glucan Supplementation in Nile tilapia (Oreochromis niloticus).	Animals. 10(12),	10.3390/ani10122243
Yu, L. L., Qiao, N. Z., Lii, T. Q., Yu, R. P., Zhai, Q. X., Tian, F. W., Zhao, J. X., Zhang, H. and Chen, W	2019	Dietary supplementation with probiotics regulates gut microbiota structure and function in Nile tilapia exposed to aluminum.	Peerj. 7.	10.7717/peerj.6963
Yuji-Sado, R., Raulino-Domanski, F., de Freitas, P. F. and Baioco-Sales, F	2015	Growth, immune status and intestinal morphology of Nile tilapia fed dietary prebiotics (mannan oligosaccharides-MOS).	Latin American Journal of Aquatic Research. 43(5), 944-952.	10.3856/vol43-issue5-fulltext-14
Zhai, Q. X., Yu, L. L., Li, T. Q., Zhu, J. M., Zhang, C. C., Zhao, J. X., Zhang, H. and Chen, W	2017	Effect of dietary probiotic supplementation on intestinal microbiota and physiological conditions of Nile tilapia (Oreochromis niloticus) under waterborne cadmium exposure.	Antonie Van Leeuwenhoek International Journal of General and Molecular Microbiology. 110(4), 501-513.	10.1007/s10482-016-0819-x
Zhang, M. Q., Dong, B., Lai, X. X., Chen, Z., Hou, L. P., Shu, R., Huang, Y. H. and Shu, H	2021	Effects of Clostridium butyricum on growth, digestive enzyme activity, antioxidant capacity and gut microbiota in farmed tilapia (Oreochromis niloticus).	Aquaculture Research. 52(4), 1573-1584.	10.1111/are.15009
Zhou, L., Zhang, J. S., Yan, M. Z., Tang, S. S., Wang, X. D., Qin, J. G., Chen, L. Q. and Li, E. C	2020	Inulin alleviates hypersaline-stress induced oxidative stress and dysbiosis of gut microbiota in Nile tilapia (Oreochromis niloticus).	Aquaculture. 529.	10.1016/j.aquaculture.2020.735681
Zhou, Z. G., He, S. X., Liu, Y. C., Cao, Y. N., Meng, K., Yao, B., Ringo, E. and Yoon, I	2011	Gut microbial status induced by antibiotic growth promoter alters the prebiotic effects of dietary DVAQUA (R) on Aeromonas hydrophila-infected tilapia: Production, intestinal bacterial community and non-specific immunity.	Veterinary Microbiology. 149(3-4), 399-405.	10.1016/j.vetmic.2010.11.022
