# Supplementary material for: Microbiota plasticity in tilapia gut revealed by meta-analysis evaluating the effect of probiotics, prebiotics, and biofloc
Source: PeerJ. 2023 Oct 11;11:e16213. doi: 10.7717/peerj.16213 (PMC10576497; doi:10.7717/peerj.16213)
Supplement: Supplemental Information 6 [file peerj-11-16213-s006.xlsx]

## Sheet: Usables
	Bioproject	Author, year	Publication Title	Journal	Doi	Age	Issue/Challenge	Additive	Component	Environment	Platform	Hypervarible Region	Section	Geographic location
1	PRJNA342522	Zhai et al., 2017	Effect of dietary probiotic supplementation on intestinal microbiota and physiological conditions of Nile tilapia (Oreochromis niloticus) under waterborne cadmium exposure.	Antonie van Leeuwenhoek International Journal of General and Molecular Microbiology.	https://doi.org/10.1007/s10482-016-0819-x	Juvenile (34.0 ± 1.16 g)	Cadmio	Probiotic	Lactobacillus plantarum	Laboratory	MiSeq	V4-V5	Gut	Wuxi, China
2	PRJNA506530	Liu et al., 2019	Using poly(β-hydroxybutyrate-β-hydroxyvalerate) as carbon source in biofloc-systems: Nitrogen dynamics and shift of Oreochromis niloticus gut microbiota.	Science of The Total Environment.	https://doi.org/10.1016/j.scitotenv.2019.133664	Fingerling		Biofloc	Poly(β-hydroxybutyrate-β-hydroxyvalerate), longan seed powder, synthesized PHBV and LP (PHBVL)	Laboratory	MiSeq	V3- V4	Gut	Guangzhou, China
3	PRJNA506618	Zhang et al., 2020	Citrobacter Species Increase Energy Harvest by Modulating Intestinal Microbiota in Fish: Nondominant Species Play Important Functions.	mSystems.	https://doi.org/10.1128/mSystems.00303-20			Probiotic	Citrobacter spp.	Laboratory	MiSeq	V3-V4	Foregut	Shanghai, China
4	PRJNA588568	Wu et al., 2020	Assessing the intestinal bacterial community of farmed Nile tilapia (Oreochromis niloticus) by high-throughput absolute abundance quantification.	Aquaculture.	https://doi.org/10.1016/j.aquaculture.2020.735688	Adult (200.75 ± 10.17 g)	Edwardsiella ictaluri and Streptococcus	Probiotic	Lactobacillus and Enterococcus	Laboratory	Illumina Miseq PE300	V3-V4	Intestine	Wuhan, China
5	PRJNA594261	Foysal et al., 2020	Meta-omits technologies reveals beneficiary effects of Lactobacillus plantarum as dietary supplements on gut microbiota, immune response and disease resistance of Nile tilapia (Oreochromis niloticus).	Aquaculture.	https://doi.org/10.1016/j.aquaculture.2020.734974	Fingerling (25.7 ± 0.6 g)	Enterococcus faecalis	Probiotic	Lactobacillus plantarum	Laboratory	MiSeq	V3-V4	Gut	Gazipur, Bangladesh
6	PRJNA612370	Wang et al., 2020	Inulin alleviates adverse metabolic syndrome and regulates intestinal microbiota composition in Nile tilapia (Oreochromis niloticus) fed with high-carbohydrate diet.	British Journal of Nutrition.	https://doi.org/10.1017/S000711452000402X	Juvenile		Prebiotic	Inulin	Laboratory	MiSeq/NovaSeq	V3-V4	Gut	Shanghai, China
7	PRJNA613504	Xu et. al., 2021	Oligosaccharides improve the flesh quality and nutrition value of Nile tilapia fed with high carbohydrate diet.	Food Chemistry: Molecular Sciences.	https://doi.org/10.1016/j.fochms.2021.100040	Juvenile (5.51 ± 0.16 g)		Prebiotic	Oligosaccharides, xylo-oligosaccharide (XOS), galacto-oligosaccharide (GOS)	Laboratory	MiSeq	V3-V5	Gut	Shanghai, China
8	PRJNA613970	Xia et al., 2020	Effects of probiotic supplementation on gut microbiota as well as metabolite profiles within Nile tilapia, Oreochromis niloticus.	Aquaculture.	https://doi.org/10.1016/j.aquaculture.2020.735428	Juvenile (4.68 gr)		Probiotic	Lactococcus lactis subsp. lactis JCM5805	Laboratory	MiSeq or Hi-seq?	V3-V4	Hindgut	Guangzhou, China
9	PRJNA615286	Xu et al., 2022	Lactobacillus plantarum Ameliorates High-Carbohydrate Diet-Induced Hepatic Lipid Accumulation and Oxidative Stress by Upregulating Uridine Synthesis.	Antioxidants.	https://doi.org/10.3390/antiox11071238	Juvenile (1.66 ± 0.05 g)		Prebiotic	Lactobacillus plantarum	Laboratory	MiSeq	V3-V4	Intestine	Guangzhou, China
10	PRJNA703957	Maas et al., 2021	Exogenous enzymes and probiotics alter digestion kinetics, volatile fatty acid content and microbial interactions in the gut of Nile tilapia.	Scientific Reports.	https://doi.org/10.1038/s41598-021-87408-3	Juvenile (39 g)		Probiotic	Bacillus amyloliquefaciens/phytase and xylanase	RAS	MiSeq	V3- V4	Distal gut	Someren, The Netherlands
11	PRJNA748076	Deng et al., 2022	Effect of rearing systems and dietary probiotic supplementation on the growth and gut microbiota of Nile tilapia (Oreochromis niloticus) larvae.	Aquaculture.	https://doi.org/10.1016/j.aquaculture.2021.737297	Larvae		Probiotic	Bacillus subtilis	FTS/RAS	MiSeq	V4	Gut	Velden, the Netherlands
12	PRJNA766406	Wang et al., 2022	Effects of dietary mannan oligosaccharides (MOS) supplementation on metabolism, inflammatory response and gut microbiota of juvenile Nile tilapia (Oreochromis niloticus) fed with high carbohydrate diet.	Fish & Shellfish Immunology.	https://doi.org/10.1016/j.fsi.2022.09.052	Juvenile (1.19 ± 0.01g)		Prebiotic	Mannan oligosaccharides (MOS)	Laboratory	MiSeq/NovaSeq	V3-V4	Intestine	Guangzhou, China
13	PRJNA805534	Xu et al., 2022	Lactobacillus plantarum Ameliorates High-Carbohydrate Diet-Induced Hepatic Lipid Accumulation and Oxidative Stress by Upregulating Uridine Synthesis.	Antioxidants.	https://doi.org/10.3390/antiox11071238	Juvenile (1.66 ± 0.05 g)		Prebiotic	Lactobacillus plantarum	Laboratory	MiSeq	V3-V4	Intestine	Guangzhou, China
14	PRJNA896332	Rahman et al., 2022	Suppression of Streptococcosis and Modulation of the Gut Bacteriome in Nile Tilapia (Oreochromis niloticus) by the Marine Sediment Bacteria Bacillus haynesii and Advenella mimigardefordensis.	Microbiology Spectrum.	https://doi.org/10.1128/spectrum.02542-22	Fingerlings (30 ± 1.2 g)		Probiotic	Bacillus haynesii CD223 and Advenella mimigardefordensis SM421	Laboratory	MiSeq	V3-V5	Hindgut	Mymensingh, Bangladesh
