# Supplementary material for: Microbiota plasticity in tilapia gut revealed by meta-analysis evaluating the effect of probiotics, prebiotics, and biofloc
Source: PeerJ. 2023 Oct 11;11:e16213. doi: 10.7717/peerj.16213 (PMC10576497; doi:10.7717/peerj.16213)
Supplement: Supplemental Information 7 [file peerj-11-16213-s007.xlsx]

## Sheet: Depurada
#SampleID	Bioproject	Biosample	Tratamiento	Component	sample_type	Gut Section	Age	AvgLenght
	PRJNA342522
SRR4242265	PRJNA342522	SAMN05761762			Control	Gut	Juvenile	502
SRR4242266	PRJNA342522	SAMN05761763			Control	Gut	Juvenile	502
SRR4242269	PRJNA342522	SAMN05761764			Control	Gut	Juvenile	502
SRR4242270	PRJNA342522	SAMN05761765		Lactobacillus plantarum	Probiotic	Gut	Juvenile	502
SRR4242271	PRJNA342522	SAMN05761766		Lactobacillus plantarum	Probiotic	Gut	Juvenile	502
SRR4242272	PRJNA342522	SAMN05761767		Lactobacillus plantarum	Probiotic	Gut	Juvenile	502
SRR4242273	PRJNA342522	SAMN05761768	Cd		Control	Gut	Juvenile	502
SRR4242274	PRJNA342522	SAMN05761769	Cd		Control	Gut	Juvenile	502
SRR4242275	PRJNA342522	SAMN05761770	Cd		Control	Gut	Juvenile	502
SRR4242276	PRJNA342522	SAMN05761771	Cd_Probiotic	Lactobacillus plantarum	Probiotic	Gut	Juvenile	502
SRR4242267	PRJNA342522	SAMN05761772	Cd_Probiotic	Lactobacillus plantarum	Probiotic	Gut	Juvenile	502
SRR4242268	PRJNA342522	SAMN05761773	Cd_Probiotic	Lactobacillus plantarum	Probiotic	Gut	Juvenile	502
	PRJNA506530
SRR8244574	PRJNA506530	SAMN10462268	LP	Longan seed powder	Biofloc	Gut	Fingerling	494
SRR8244573	PRJNA506530	SAMN10462269	LP	Longan seed powder	Biofloc	Gut	Fingerling	494
SRR8244576	PRJNA506530	SAMN10462270	LP	Longan seed powder	Biofloc	Gut	Fingerling	494
SRR8244575	PRJNA506530	SAMN10462271	PHBVL	Synthesized PHBV and LP	Biofloc	Gut	Fingerling	494
SRR8244578	PRJNA506530	SAMN10462272	PHBVL	Synthesized PHBV and LP	Biofloc	Gut	Fingerling	494
SRR8244577	PRJNA506530	SAMN10462273	PHBVL	Synthesized PHBV and LP	Biofloc	Gut	Fingerling	494
SRR8244580	PRJNA506530	SAMN10462274	PHBV	Poly(β-hydroxybutyrate-β-hydroxyvalerate)	Biofloc	Gut	Fingerling	494
SRR8244579	PRJNA506530	SAMN10462275	PHBV	Poly(β-hydroxybutyrate-β-hydroxyvalerate)	Biofloc	Gut	Fingerling	494
SRR8244581	PRJNA506530	SAMN10462276	PHBV	Poly(β-hydroxybutyrate-β-hydroxyvalerate)	Biofloc	Gut	Fingerling	494
	PRJNA506618
SRR8238744	PRJNA506618	SAMN10465330	control 1		Control	Foregut		602
SRR8238743	PRJNA506618	SAMN10465331	control 2		Control	Foregut		602
SRR8238742	PRJNA506618	SAMN10465332	control 3		Control	Foregut		602
SRR8238741	PRJNA506618	SAMN10465333	control 4		Control	Foregut		602
SRR8238740	PRJNA506618	SAMN10465334	control 5		Control	Foregut		602
SRR8238739	PRJNA506618	SAMN10465335	add with SOB9 in control diet 1	Citrobacter spp.	Probiotic	Foregut		602
SRR8238738	PRJNA506618	SAMN10465336	add with SOB9 in control diet 2	Citrobacter spp.	Probiotic	Foregut		602
SRR8238737	PRJNA506618	SAMN10465337	add with SOB9 in control diet 3	Citrobacter spp.	Probiotic	Foregut		602
SRR8238746	PRJNA506618	SAMN10465338	high fat diet 1		Control	Foregut		602
SRR8238745	PRJNA506618	SAMN10465339	high fat diet 2		Control	Foregut		602
SRR8238734	PRJNA506618	SAMN10465340	high fat diet 3		Control	Foregut		602
SRR8238733	PRJNA506618	SAMN10465341	high fat diet 4		Control	Foregut		602
SRR8238736	PRJNA506618	SAMN10465342	high fat diet 5		Control	Foregut		602
SRR8238735	PRJNA506618	SAMN10465343	add with SOB9 in fat diet 1	Citrobacter spp.	Probiotic	Foregut		602
SRR8238730	PRJNA506618	SAMN10465344	add with SOB9 in fat diet 2	Citrobacter spp.	Probiotic	Foregut		602
SRR8238729	PRJNA506618	SAMN10465345	add with SOB9 in fat diet 3	Citrobacter spp.	Probiotic	Foregut		602
SRR8238732	PRJNA506618	SAMN10465346	add with SOB9 in fat diet 4	Citrobacter spp.	Probiotic	Foregut		602
SRR8238731	PRJNA506618	SAMN10465347	add with SOB9 in fat diet 5	Citrobacter spp.	Probiotic	Foregut		602
	PRJNA588568
SRR10430169	PRJNA588568	SAMN13254163	Control_16S_1		Control	Intestine	Adult	602
SRR10430168	PRJNA588568	SAMN13254164	Control_16S_2		Control	Intestine	Adult	602
SRR10430161	PRJNA588568	SAMN13254165	Control_16S_3		Control	Intestine	Adult	602
SRR10430160	PRJNA588568	SAMN13254166	Control_16S_4		Control	Intestine	Adult	602
SRR10430159	PRJNA588568	SAMN13254167	Low_16S_1	Lactobacillus and Enterococcus 10 μL	Probiotic	Intestine	Adult	602
SRR10430158	PRJNA588568	SAMN13254168	Low_16S_2	Lactobacillus and Enterococcus 10 μL	Probiotic	Intestine	Adult	602
SRR10430157	PRJNA588568	SAMN13254169	Low_16S_3	Lactobacillus and Enterococcus 10 μL	Probiotic	Intestine	Adult	602
SRR10430156	PRJNA588568	SAMN13254170	Low_16S_4	Lactobacillus and Enterococcus 10 μL	Probiotic	Intestine	Adult	602
SRR10430155	PRJNA588568	SAMN13254171	Medium_16S_1	Lactobacillus and Enterococcus 100 μL	Probiotic	Intestine	Adult	602
SRR10430154	PRJNA588568	SAMN13254172	Medium_16S_2	Lactobacillus and Enterococcus 100 μL	Probiotic	Intestine	Adult	602
SRR10430167	PRJNA588568	SAMN13254173	Medium_16S_3	Lactobacillus and Enterococcus 100 μL	Probiotic	Intestine	Adult	602
SRR10430166	PRJNA588568	SAMN13254174	Medium_16S_4	Lactobacillus and Enterococcus 100 μL	Probiotic	Intestine	Adult	602
SRR10430165	PRJNA588568	SAMN13254175	High_16S_1	Lactobacillus and Enterococcus 200 μL	Probiotic	Intestine	Adult	602
SRR10430164	PRJNA588568	SAMN13254176	High_16S_2	Lactobacillus and Enterococcus 200 μL	Probiotic	Intestine	Adult	602
SRR10430163	PRJNA588568	SAMN13254177	High_16S_3	Lactobacillus and Enterococcus 200 μL	Probiotic	Intestine	Adult	602
SRR10430162	PRJNA588568	SAMN13254178	High_16S_4	Lactobacillus and Enterococcus 200 μL	Probiotic	Intestine	Adult	602
	PRJNA594261
SRR10607002	PRJNA594261	SAMN13509882			Control	Gut	Fingerling	593
SRR10607001	PRJNA594261	SAMN13509883			Control	Gut	Fingerling	593
SRR10607000	PRJNA594261	SAMN13509884			Control	Gut	Fingerling	593
SRR10606999	PRJNA594261	SAMN13509885	Lactobacillus plantarum	Lactobacillus plantarum	Probiotic	Gut	Fingerling	593
SRR10606998	PRJNA594261	SAMN13509886	Lactobacillus plantarum	Lactobacillus plantarum	Probiotic	Gut	Fingerling	593
SRR10606997	PRJNA594261	SAMN13509887	Lactobacillus plantarum	Lactobacillus plantarum	Probiotic	Gut	Fingerling	593
	PRJNA612370
SRR11304776	PRJNA612370	SAMN14371194	fed with control1	35% carbohydrate	Control	Intestinal content	Juvenile	495
SRR11304775	PRJNA612370	SAMN14371195	fed with control2	35% carbohydrate	Control	Intestinal content	Juvenile	495
SRR11304764	PRJNA612370	SAMN14371196	fed with control3	35% carbohydrate	Control	Intestinal content	Juvenile	495
SRR11304762	PRJNA612370	SAMN14371197	fed with control4	35% carbohydrate	Control	Intestinal content	Juvenile	495
SRR11304761	PRJNA612370	SAMN14371198	fed with control5	35% carbohydrate	Control	Intestinal content	Juvenile	495
SRR11304760	PRJNA612370	SAMN14371199	fed with control6	35% carbohydrate	Control	Intestinal content	Juvenile	495
SRR11304759	PRJNA612370	SAMN14371200	fed with control7	35% carbohydrate	Control	Intestinal content	Juvenile	495
SRR11304758	PRJNA612370	SAMN14371201	fed with high-carbohydrate diet 1	45% carbohydrate	Control	Intestinal content	Juvenile	495
SRR11304757	PRJNA612370	SAMN14371202	fed with high-carbohydrate diet 2	45% carbohydrate	Control	Intestinal content	Juvenile	495
SRR11304756	PRJNA612370	SAMN14371203	fed with high-carbohydrate diet 3	45% carbohydrate	Control	Intestinal content	Juvenile	495
SRR11304774	PRJNA612370	SAMN14371204	fed with high-carbohydrate diet 4	45% carbohydrate	Control	Intestinal content	Juvenile	495
SRR11304773	PRJNA612370	SAMN14371205	fed with high-carbohydrate diet 5	45% carbohydrate	Control	Intestinal content	Juvenile	495
SRR11304772	PRJNA612370	SAMN14371206	fed with high-carbohydrate diet 6	45% carbohydrate	Control	Intestinal content	Juvenile	495
SRR11304771	PRJNA612370	SAMN14371207	fed with high-carbohydrate diet 7	45% carbohydrate	Control	Intestinal content	Juvenile	495
SRR11304770	PRJNA612370	SAMN14371208	fed with high-carbohydrate+inulin diet 1	45% carbohydrate + 5g/kg inulin	Prebiotic	Intestinal content	Juvenile	495
SRR11304769	PRJNA612370	SAMN14371209	fed with high-carbohydrate+inulin diet 2	45% carbohydrate + 5g/kg inulin	Prebiotic	Intestinal content	Juvenile	495
SRR11304768	PRJNA612370	SAMN14371210	fed with high-carbohydrate+inulin diet 3	45% carbohydrate + 5g/kg inulin	Prebiotic	Intestinal content	Juvenile	495
SRR11304767	PRJNA612370	SAMN14371211	fed with high-carbohydrate+inulin diet 4	45% carbohydrate + 5g/kg inulin	Prebiotic	Intestinal content	Juvenile	495
SRR11304766	PRJNA612370	SAMN14371212	fed with high-carbohydrate+inulin diet 5	45% carbohydrate + 5g/kg inulin	Prebiotic	Intestinal content	Juvenile	495
SRR11304765	PRJNA612370	SAMN14371213	fed with high-carbohydrate+inulin diet 6	45% carbohydrate + 5g/kg inulin	Prebiotic	Intestinal content	Juvenile	495
SRR11304763	PRJNA612370	SAMN14371214	fed with high-carbohydrate+inulin diet 7	45% carbohydrate + 5g/kg inulin	Prebiotic	Intestinal content	Juvenile	495
	PRJNA613504
SRR11356276	PRJNA613504	SAMN14408557	fed with control1	30% carbohydrate diet	Control	Gut	Juvenile	602
SRR11356275	PRJNA613504	SAMN14408558	fed with control2	30% carbohydrate diet	Control	Gut	Juvenile	602
SRR11356264	PRJNA613504	SAMN14408559	fed with control3	30% carbohydrate diet	Control	Gut	Juvenile	602
SRR11356263	PRJNA613504	SAMN14408560	fed with control4	30% carbohydrate diet	Control	Gut	Juvenile	602
SRR11356262	PRJNA613504	SAMN14408561	fed with control5	30% carbohydrate diet	Control	Gut	Juvenile	602
SRR11356261	PRJNA613504	SAMN14408562	fed with high-carbohydrate1	42% carbohydrate diet	Control	Gut	Juvenile	602
SRR11356260	PRJNA613504	SAMN14408563	fed with high-carbohydrate2	42% carbohydrate diet	Control	Gut	Juvenile	602
SRR11356259	PRJNA613504	SAMN14408564	fed with high-carbohydrate3	42% carbohydrate diet	Control	Gut	Juvenile	602
SRR11356258	PRJNA613504	SAMN14408565	fed with high-carbohydrate4	42% carbohydrate diet	Control	Gut	Juvenile	602
SRR11356257	PRJNA613504	SAMN14408566	fed with high-carbohydrate5	42% carbohydrate diet	Control	Gut	Juvenile	602
SRR11356274	PRJNA613504	SAMN14408567	fed with high-carbohydrate+GOS1	42% carbohydrate diet + 10 g·Kg−1 GOS	Prebiotic	Gut	Juvenile	602
SRR11356273	PRJNA613504	SAMN14408568	fed with high-carbohydrate+GOS2	42% carbohydrate diet + 10 g·Kg−1 GOS	Prebiotic	Gut	Juvenile	602
SRR11356272	PRJNA613504	SAMN14408569	fed with high-carbohydrate+GOS3	42% carbohydrate diet + 10 g·Kg−1 GOS	Prebiotic	Gut	Juvenile	602
SRR11356271	PRJNA613504	SAMN14408570	fed with high-carbohydrate+GOS4	42% carbohydrate diet + 10 g·Kg−1 GOS	Prebiotic	Gut	Juvenile	602
SRR11356270	PRJNA613504	SAMN14408571	fed with high-carbohydrate+GOS5	42% carbohydrate diet + 10 g·Kg−1 GOS	Prebiotic	Gut	Juvenile	602
SRR11356269	PRJNA613504	SAMN14408572	fed with high-carbohydrate+XOS1	42% carbohydrate diet + 10 g·Kg−1 XOS	Prebiotic	Gut	Juvenile	602
SRR11356268	PRJNA613504	SAMN14408573	fed with high-carbohydrate+XOS2	42% carbohydrate diet + 10 g·Kg−1 XOS	Prebiotic	Gut	Juvenile	602
SRR11356267	PRJNA613504	SAMN14408574	fed with high-carbohydrate+XOS3	42% carbohydrate diet + 10 g·Kg−1 XOS	Prebiotic	Gut	Juvenile	602
SRR11356266	PRJNA613504	SAMN14408575	fed with high-carbohydrate+XOS4	42% carbohydrate diet + 10 g·Kg−1 XOS	Prebiotic	Gut	Juvenile	602
SRR11356265	PRJNA613504	SAMN14408576	fed with high-carbohydrate+XOS5	42% carbohydrate diet + 10 g·Kg−1 XOS	Prebiotic	Gut	Juvenile	602
	PRJNA613970
SRR11443121	PRJNA613970	SAMN14423257	Lactococcus lactis subsp. lactis JCM5805	Lactococcus lactis subsp. lactis JCM5805	Probiotic	Hindgut	Juvenile	499
SRR11443116	PRJNA613970	SAMN14423722	Lactococcus lactis subsp. lactis JCM5806	Lactococcus lactis subsp. lactis JCM5806	Probiotic	Hindgut	Juvenile	499
SRR11443115	PRJNA613970	SAMN14423815			Control	Hindgut	Juvenile	499
SRR11443114	PRJNA613970	SAMN14423863			Control	Hindgut	Juvenile	499
SRR11443118	PRJNA613970	SAMN14423917			Control	Hindgut	Juvenile	499
SRR11443117	PRJNA613970	SAMN14423996			Control	Hindgut	Juvenile	499
SRR11443113	PRJNA613970	SAMN14424191			Control	Hindgut	Juvenile	499
SRR11443112	PRJNA613970	SAMN14424193	Lactococcus lactis subsp. lactis JCM5805	Lactococcus lactis subsp. lactis JCM5806	Probiotic	Hindgut	Juvenile	499
SRR11443120	PRJNA613970	SAMN14424199	Lactococcus lactis subsp. lactis JCM5806	Lactococcus lactis subsp. lactis JCM5807	Probiotic	Hindgut	Juvenile	499
SRR11443119	PRJNA613970	SAMN14424200			Control	Hindgut	Juvenile	499
	PRJNA615286
SRR11429026	PRJNA615286	SAMN14450131	fed with control diet 1	No carbohydrate diet	Control	Intestine	Juvenile	602
SRR11429025	PRJNA615286	SAMN14450132	fed with control diet 2	No carbohydrate diet	Control	Intestine	Juvenile	602
SRR11429016	PRJNA615286	SAMN14450133	fed with control diet 3	No carbohydrate diet	Control	Intestine	Juvenile	602
SRR11429015	PRJNA615286	SAMN14450134	fed with control diet 4	No carbohydrate diet	Control	Intestine	Juvenile	602
SRR11429014	PRJNA615286	SAMN14450135	fed with control diet 5	No carbohydrate diet	Control	Intestine	Juvenile	602
SRR11429013	PRJNA615286	SAMN14450136	fed with control diet 6	No carbohydrate diet	Control	Intestine	Juvenile	602
SRR11429012	PRJNA615286	SAMN14450137	fed with high-carbohydrate diet 1	High-carbohydrate diet	Control	Intestine	Juvenile	602
SRR11429011	PRJNA615286	SAMN14450138	fed with high-carbohydrate diet 2	High-carbohydrate diet	Control	Intestine	Juvenile	602
SRR11429010	PRJNA615286	SAMN14450139	fed with high-carbohydrate diet 3	High-carbohydrate diet	Control	Intestine	Juvenile	602
SRR11429009	PRJNA615286	SAMN14450140	fed with high-carbohydrate diet 4	High-carbohydrate diet	Control	Intestine	Juvenile	602
SRR11429024	PRJNA615286	SAMN14450141	fed with high-carbohydrate diet 5	High-carbohydrate diet	Control	Intestine	Juvenile	602
SRR11429023	PRJNA615286	SAMN14450142	fed with high-carbohydrate diet 6	High-carbohydrate diet	Control	Intestine	Juvenile	602
SRR11429022	PRJNA615286	SAMN14450143	fed with high-carbohydrate diet+B.amy SS1 1	High-carbohydrate diet + L. plantarum (MR1)	Prebiotic	Intestine	Juvenile	602
SRR11429021	PRJNA615286	SAMN14450144	fed with high-carbohydrate diet+B.amy SS1 2	High-carbohydrate diet + L. plantarum (MR1)	Prebiotic	Intestine	Juvenile	602
SRR11429020	PRJNA615286	SAMN14450145	fed with high-carbohydrate diet+B.amy SS1 3	High-carbohydrate diet + L. plantarum (MR1)	Prebiotic	Intestine	Juvenile	602
SRR11429019	PRJNA615286	SAMN14450146	fed with high-carbohydrate diet+B.amy SS1 4	High-carbohydrate diet + L. plantarum (MR1)	Prebiotic	Intestine	Juvenile	602
SRR11429018	PRJNA615286	SAMN14450147	fed with high-carbohydrate diet+B.amy SS1 5	High-carbohydrate diet + L. plantarum (MR1)	Prebiotic	Intestine	Juvenile	602
SRR11429017	PRJNA615286	SAMN14450148	fed with high-carbohydrate diet+B.amy SS1 6	High-carbohydrate diet + L. plantarum (MR1)	Prebiotic	Intestine	Juvenile	602
	PRJNA703957
SRR13768006	PRJNA703957	SAMN18026073	Tank-1-Fish-1-R1	CON-PRO	Probiotic	Distal gut	Juvenile	583
SRR13768005	PRJNA703957	SAMN18026074	Tank-1-Fish-2-R1	CON-PRO	Probiotic	Distal gut	Juvenile	583
SRR13767974	PRJNA703957	SAMN18026075	Tank-1-Fish-3-R1	CON-PRO	Probiotic	Distal gut	Juvenile	583
SRR13767993	PRJNA703957	SAMN18026076	Tank-2_Fish-1-R1	CON-CON	Control	Distal gut	Juvenile	583
SRR13767968	PRJNA703957	SAMN18026077	Tank-2-Fish-2-R1	CON-CON	Control	Distal gut	Juvenile	583
SRR13767970	PRJNA703957	SAMN18026078	Tank-2-Fish-3-R1	CON-CON	Control	Distal gut	Juvenile	583
SRR13767973	PRJNA703957	SAMN18026079	Tank-3-Fish-1-R1	CON-PRO	Probiotic	Distal gut	Juvenile	583
SRR13767971	PRJNA703957	SAMN18026080	Tank-3-Fish-2-R1	CON-PRO	Probiotic	Distal gut	Juvenile	583
SRR13767972	PRJNA703957	SAMN18026081	Tank-3-Fish-3-R1	CON-PRO	Probiotic	Distal gut	Juvenile	583
SRR13767998	PRJNA703957	SAMN18026082	Tank-4-Fish-1-R1 Enzyme	ENZ-PRO	Probiotic	Distal gut	Juvenile	583
SRR13768004	PRJNA703957	SAMN18026083	Tank-4-Fish-2-R1 Enzyme	ENZ-PRO	Probiotic	Distal gut	Juvenile	583
SRR13768003	PRJNA703957	SAMN18026084	Tank-4-Fish-3-R1 Enzyme	ENZ-PRO	Probiotic	Distal gut	Juvenile	583
SRR13768002	PRJNA703957	SAMN18026085	Tank-5-fish-2-R1	CON-CON	Control	Distal gut	Juvenile	583
SRR13768001	PRJNA703957	SAMN18026086	Tank-5-fish-3-R1	CON-CON	Control	Distal gut	Juvenile	583
SRR13768000	PRJNA703957	SAMN18026087	Tank-6-fish-1-R1 Enzyme	ENZ-CON	Control	Distal gut	Juvenile	583
SRR13767999	PRJNA703957	SAMN18026088	Tank-7-fish-1-R1 Enzyme	ENZ-PRO	Probiotic	Distal gut	Juvenile	583
SRR13767997	PRJNA703957	SAMN18026089	Tank-7-fish-2-R1 Enzyme	ENZ-PRO	Probiotic	Distal gut	Juvenile	583
SRR13767996	PRJNA703957	SAMN18026090	Tank-7-fish-3-R1 Enzyme	ENZ-PRO	Probiotic	Distal gut	Juvenile	583
SRR13767995	PRJNA703957	SAMN18026091	Tank-8-fish-1-R1 Enzyme	ENZ-CON	Control	Distal gut	Juvenile	583
SRR13767994	PRJNA703957	SAMN18026092	Tank-8-fish-2-R1 Enzyme	ENZ-CON	Control	Distal gut	Juvenile	583
SRR13767975	PRJNA703957	SAMN18026093	Tank-8-Fish-3-R1 Enzyme	ENZ-CON	Control	Distal gut	Juvenile	583
SRR13767976	PRJNA703957	SAMN18026094	Tank-9-fish-1-R1	CON-CON	Control	Distal gut	Juvenile	583
SRR13767977	PRJNA703957	SAMN18026095	Tank-9-fish-2-R1	CON-CON	Control	Distal gut	Juvenile	583
SRR13767978	PRJNA703957	SAMN18026096	Tank-9-fish-3-R1	CON-CON	Control	Distal gut	Juvenile	583
SRR13767979	PRJNA703957	SAMN18026097	Tank-10-fish-1-R1 Enzyme	ENZ-CON	Probiotic	Distal gut	Juvenile	583
SRR13767980	PRJNA703957	SAMN18026098	Tank-10-fish-2-R1 Enzyme	ENZ-CON	Probiotic	Distal gut	Juvenile	583
SRR13767981	PRJNA703957	SAMN18026099	Tank-10-fish-3-R1 Enzyme	ENZ-CON	Probiotic	Distal gut	Juvenile	583
SRR13767982	PRJNA703957	SAMN18026100	Tank-11-fish-1-R1 Enzyme	ENZ-CON	Control	Distal gut	Juvenile	583
SRR13767983	PRJNA703957	SAMN18026101	Tank-11-fish-2-R1 Enzyme	ENZ-CON	Control	Distal gut	Juvenile	583
SRR13767984	PRJNA703957	SAMN18026102	Tank-12-fish-1-R1 Enzyme	ENZ-CON	Control	Distal gut	Juvenile	583
SRR13767992	PRJNA703957	SAMN18026103	Tank-12-fish-2-R1 Enzyme	ENZ-CON	Control	Distal gut	Juvenile	583
SRR13767985	PRJNA703957	SAMN18026104	Tank-12-fish-3-R1 Enzyme	ENZ-CON	Control	Distal gut	Juvenile	583
SRR13767986	PRJNA703957	SAMN18026105	Tank-13-fish-1-R1	CON-CON	Control	Distal gut	Juvenile	583
SRR13767987	PRJNA703957	SAMN18026106	Tank-13-fish-2-R1	CON-CON	Control	Distal gut	Juvenile	583
SRR13767988	PRJNA703957	SAMN18026107	Tank-13-fish-3-R1	CON-CON	Control	Distal gut	Juvenile	583
SRR13767963	PRJNA703957	SAMN18026108	Tank-14-fish-1-R1 Enzyme	ENZ-PRO	Probiotic	Distal gut	Juvenile	583
SRR13767964	PRJNA703957	SAMN18026109	Tank-14-fish-2-R1 Enzyme	ENZ-PRO	Probiotic	Distal gut	Juvenile	583
SRR13767965	PRJNA703957	SAMN18026110	Tank-14-fish-3-R1 Enzyme	ENZ-PRO	Probiotic	Distal gut	Juvenile	583
SRR13767966	PRJNA703957	SAMN18026111	Tank-15-Fish-1-R1	CON-PRO	Probiotic	Distal gut	Juvenile	583
SRR13767967	PRJNA703957	SAMN18026112	Tank-15-fish-2-R1	CON-PRO	Probiotic	Distal gut	Juvenile	583
SRR13767969	PRJNA703957	SAMN18026113	Tank-15-fish-3-R1	CON-PRO	Probiotic	Distal gut	Juvenile	583
SRR13767989	PRJNA703957	SAMN18026114	Tank-16-fish-1-R1	CON-PRO	Probiotic	Distal gut	Juvenile	583
SRR13767990	PRJNA703957	SAMN18026115	Tank-16-fish-2-R1	CON-PRO	Probiotic	Distal gut	Juvenile	583
SRR13767991	PRJNA703957	SAMN18026116	Tank-16-fish-3-R1	CON-PRO	Probiotic	Distal gut	Juvenile	583
	PRJNA748076
SRR15194091	PRJNA748076	SAMN20307734	Gut.FTS.A1	FTS + control diet	Control	Gut	Larvae	600
SRR15194090	PRJNA748076	SAMN20307735	Gut.FTS.A2	FTS + control diet	Control	Gut	Larvae	600
SRR15194079	PRJNA748076	SAMN20307736	Gut.FTS.A3	FTS + control diet	Control	Gut	Larvae	600
SRR15194071	PRJNA748076	SAMN20307737	Gut.FTS.B1	FTS + control diet	Control	Gut	Larvae	600
SRR15194070	PRJNA748076	SAMN20307738	Gut.FTS.B2	FTS + control diet	Control	Gut	Larvae	600
SRR15194069	PRJNA748076	SAMN20307739	Gut.FTS.B3	FTS + control diet	Control	Gut	Larvae	600
SRR15194068	PRJNA748076	SAMN20307740	Gut.FTS.C1	FTS + control diet	Control	Gut	Larvae	600
SRR15194067	PRJNA748076	SAMN20307741	Gut.FTS.C2	FTS + control diet	Control	Gut	Larvae	600
SRR15194066	PRJNA748076	SAMN20307742	Gut.FTS.C3	FTS + control diet	Control	Gut	Larvae	600
SRR15194065	PRJNA748076	SAMN20307743	Gut.RAS.A1	RAS + control diet	Control	Gut	Larvae	600
SRR15194089	PRJNA748076	SAMN20307744	Gut.RAS.A2	RAS + control diet	Control	Gut	Larvae	600
SRR15194088	PRJNA748076	SAMN20307745	Gut.RAS.A3	RAS + control diet	Control	Gut	Larvae	600
SRR15194087	PRJNA748076	SAMN20307746	Gut.RAS.B1	RAS + control diet	Control	Gut	Larvae	600
SRR15194086	PRJNA748076	SAMN20307747	Gut.RAS.B2	RAS + control diet	Control	Gut	Larvae	600
SRR15194085	PRJNA748076	SAMN20307748	Gut.RAS.B3	RAS + control diet	Control	Gut	Larvae	600
SRR15194084	PRJNA748076	SAMN20307749	Gut.RAS.C1	RAS + control diet	Control	Gut	Larvae	600
SRR15194083	PRJNA748076	SAMN20307750	Gut.RAS.C2	RAS + control diet	Control	Gut	Larvae	600
SRR15194082	PRJNA748076	SAMN20307751	Gut.RAS.C3	RAS + control diet	Control	Gut	Larvae	600
SRR15194081	PRJNA748076	SAMN20307752	Gut.RASB.A1	RAS + B. subtilis coated diet	Probiotic	Gut	Larvae	600
SRR15194080	PRJNA748076	SAMN20307753	Gut.RASB.A2	RAS + B. subtilis coated diet	Probiotic	Gut	Larvae	600
SRR15194078	PRJNA748076	SAMN20307754	Gut.RASB.A3	RAS + B. subtilis coated diet	Probiotic	Gut	Larvae	600
SRR15194077	PRJNA748076	SAMN20307755	Gut.RASB.B1	RAS + B. subtilis coated diet	Probiotic	Gut	Larvae	600
SRR15194076	PRJNA748076	SAMN20307756	Gut.RASB.B2	RAS + B. subtilis coated diet	Probiotic	Gut	Larvae	600
SRR15194075	PRJNA748076	SAMN20307757	Gut.RASB.B3	RAS + B. subtilis coated diet	Probiotic	Gut	Larvae	600
SRR15194074	PRJNA748076	SAMN20307758	Gut.RASB.C1	RAS + B. subtilis coated diet	Probiotic	Gut	Larvae	600
SRR15194073	PRJNA748076	SAMN20307759	Gut.RASB.C2	RAS + B. subtilis coated diet	Probiotic	Gut	Larvae	600
SRR15194072	PRJNA748076	SAMN20307760	Gut.RASB.C3	RAS + B. subtilis coated diet	Probiotic	Gut	Larvae	600
	PRJNA766406
SRR16090683	PRJNA766406	SAMN21844468	fish metagenome-1	45% carbohydrate diet + 5g/kg MOS	Prebiotic	Gut	Juvenile	495
SRR16090682	PRJNA766406	SAMN21844469	fish metagenome-2	45% carbohydrate diet + 5g/kg MOS	Prebiotic	Gut	Juvenile	495
SRR16090681	PRJNA766406	SAMN21844470	fish metagenome-3	45% carbohydrate diet + 5g/kg MOS	Prebiotic	Gut	Juvenile	495
SRR16090680	PRJNA766406	SAMN21844471	fish metagenome-4	45% carbohydrate diet + 5g/kg MOS	Prebiotic	Gut	Juvenile	495
SRR16090679	PRJNA766406	SAMN21844472	fish metagenome-5	45% carbohydrate diet + 5g/kg MOS	Prebiotic	Gut	Juvenile	495
SRR16090678	PRJNA766406	SAMN21844473	fish metagenome-6	45% carbohydrate diet + 5g/kg MOS	Prebiotic	Gut	Juvenile	495
	PRJNA805534
SRR18006588	PRJNA805534	SAMN25861600	intestinal content.1	High-carbohydrate diet + L. plantarum (MR1)	Prebiotic	Intestine	Juvenile	602
SRR18006587	PRJNA805534	SAMN25861601	intestinal content.2	High-carbohydrate diet + L. plantarum (MR1)	Prebiotic	Intestine	Juvenile	602
SRR18006586	PRJNA805534	SAMN25861602	intestinal content.3	High-carbohydrate diet + L. plantarum (MR1)	Prebiotic	Intestine	Juvenile	602
SRR18006585	PRJNA805534	SAMN25861603	intestinal content.4	High-carbohydrate diet + L. plantarum (MR1)	Prebiotic	Intestine	Juvenile	602
SRR18006584	PRJNA805534	SAMN25861604	intestinal content.5	High-carbohydrate diet + L. plantarum (MR1)	Prebiotic	Intestine	Juvenile	602
	PRJNA896332
SRR22129580	PRJNA896332	SAMN31542233			Control	Hindgut	Fingerling	596
SRR22129629	PRJNA896332	SAMN31542234			Control	Hindgut	Fingerling	596
SRR22129819	PRJNA896332	SAMN31542235			Control	Hindgut	Fingerling	596
SRR22130090	PRJNA896332	SAMN31542244	Bacillus haynesii strain CD223	Bacillus haynesii strain CD223	Probiotic	Hindgut	Fingerling	596
SRR22130831	PRJNA896332	SAMN31542245	Bacillus haynesii strain CD224	Bacillus haynesii strain CD224	Probiotic	Hindgut	Fingerling	596
SRR22130859	PRJNA896332	SAMN31542246	Bacillus haynesii strain CD225	Bacillus haynesii strain CD225	Probiotic	Hindgut	Fingerling	596
SRR22136556	PRJNA896332	SAMN31542346	Advenella mimigardefordensis strain SM421	Advenella mimigardefordensis strain SM421	Probiotic	Hindgut	Fingerling	596
SRR22136584	PRJNA896332	SAMN31542347	Advenella mimigardefordensis strain SM422	Advenella mimigardefordensis strain SM422	Probiotic	Hindgut	Fingerling	596
SRR22136605	PRJNA896332	SAMN31542348	Advenella mimigardefordensis strain SM423	Advenella mimigardefordensis strain SM423	Probiotic	Hindgut	Fingerling	596
