# Supplementary material for: Microbiota plasticity in tilapia gut revealed by meta-analysis evaluating the effect of probiotics, prebiotics, and biofloc
Source: PeerJ. 2023 Oct 11;11:e16213. doi: 10.7717/peerj.16213 (PMC10576497; doi:10.7717/peerj.16213)
Supplement: Supplemental Information 9 [file peerj-11-16213-s009.xlsx]

## Sheet: kegg_mean_bp_treatment_0.9
Pathway	Pro_342522_Exp	Pro_342522_Ctrl1	Pro_342522_Ctrl2	Pro_588568_Exp1	Pro_588568_Exp3	Pro_588568_Exp2	Pro_588568_Ctrl	Pro_748076_Ctrl1	Pro_748076_Ctrl2	Pro_748076_Exp	Pro_703957_Ctrl1	Pro_703957_Ctrl2	Pro_703957_Exp1	Pro_703957_Exp2	Pro_613970_Exp	Pro_613970_Ctrl	Pro_896332_Ctrl	Pro_896332_Exp1	Pro_896332_Exp2	Pro_506618_Exp	Pro_506618_Ctrl1	Pro_506618_Ctrl2	Pro_594261_Ctrl	Pro_594261_Exp	Pre_612370_Ctrl1	Pre_612370_Ctrl2	Pre_612370_Exp	Pre_766406_Exp	Pre_613504_Ctrl2	Pre_613504_Ctrl1	Pre_613504_Exp2	Pre_613504_Exp1	Pre_615286_Exp	Pre_615286_Ctrl1	Pre_615286_Ctrl2	Pre_805534_Exp	Bio_506530_Ctrl	Bio_506530_Exp1	Bio_506530_Exp2
ko01051	0.0353534	0.0278358	0.0470788	0.0483832	0.0445663	0.0397711	0.0464133	0.022731	0.0228673	0.021999	0.0525366	0.0461507	0.0509582	0.0519416	0.0368711	0.0276333	0.0783072	0.0766385	0.0772455	0.0288558	0.0218985	0.0362503	0.0254946	0.019039	0.0276959	0.0253861	0.0288568	0.0218285	0.0222054	0.0248086	0.0184156	0.0181875	0.025141	0.0258015	0.0274914	0.0209626	0.0322493	0.0328884	0.0391016
ko01055	0.027991	0.026545	0.0333903	0.0308221	0.0214459	0.0237575	0.0301885	0.0153923	0.0175209	0.0161192	0.0227052	0.0219525	0.0229541	0.0229397	0.0184497	0.0159199	0.0264628	0.0265963	0.0263698	0.0195623	0.0178411	0.00917573	0.0201666	0.014761	0.0217635	0.017978	0.0199995	0.0193722	0.0174013	0.0217065	0.0162639	0.0152064	0.00932086	0.00991751	0.0161924	0.0215749	0.0224586	0.0243866	0.0296116
ko00290	0.0199085	0.0197701	0.0201703	0.0198956	0.0202643	0.0197357	0.019184	0.0187804	0.0172478	0.0174865	0.017766	0.0187936	0.0185198	0.0190023	0.0200739	0.0206467	0.0121356	0.0124822	0.012188	0.0190334	0.0205385	0.0167747	0.0206448	0.0174696	0.0180618	0.0198229	0.019076	0.0197103	0.0180574	0.0192573	0.0179013	0.0181689	0.0199812	0.0203818	0.0179819	0.018109	0.0210628	0.019884	0.0199906
ko00061	0.0196868	0.019972	0.0193579	0.0184555	0.0183455	0.0199927	0.0182121	0.0177626	0.0172266	0.0165734	0.0195276	0.0190519	0.0197162	0.0194932	0.0192194	0.0174872	0.0202071	0.0200896	0.0200436	0.0195294	0.0171699	0.0184409	0.0195961	0.0192059	0.0195689	0.0177007	0.0176853	0.0143486	0.0175822	0.0184142	0.0179065	0.0193851	0.0193184	0.0191235	0.0202339	0.022463	0.0191124	0.0182363	0.0184359
ko00471	0.0192168	0.0155462	0.0237417	0.0234452	0.0202158	0.0196316	0.0235441	0.012917	0.0135292	0.0141364	0.0221157	0.0215101	0.0223091	0.0225627	0.0171299	0.0156789	0.0262663	0.0260489	0.026052	0.0190333	0.0159251	0.0174364	0.0161855	0.0162581	0.0195156	0.0166041	0.0183859	0.0185563	0.0160487	0.016372	0.0155755	0.0124624	0.0197442	0.019567	0.0205607	0.0232882	0.0156541	0.0177647	0.020172
ko00780	0.018263	0.0152139	0.0217675	0.0216252	0.019819	0.0200832	0.0211444	0.0122791	0.0132072	0.0120737	0.0200963	0.0184907	0.0193041	0.019277	0.00954596	0.0119942	0.031366	0.0308172	0.0309731	0.00880746	0.00644148	0.0176722	0.0149036	0.0115554	0.017551	0.010183	0.0142126	0.00651417	0.00888477	0.0101522	0.0081597	0.0071925	0.0120871	0.0111577	0.0111654	0.00689545	0.0126248	0.0162787	0.0190022
ko00660	0.017394	0.0176149	0.0176412	0.0178969	0.0210681	0.018577	0.0163054	0.0165002	0.0157049	0.0151775	0.0102061	0.0122035	0.010986	0.0114246	0.0150223	0.0190077	0.00040279	0.00125791	0.00069051	0.0138741	0.0179969	0.00941891	0.0190201	0.0161132	0.0170067	0.0173256	0.017716	0.017883	0.0144593	0.015593	0.0130164	0.0141065	0.018463	0.0189131	0.0134	0.0114904	0.0181873	0.0175534	0.0168739
ko00540	0.0164553	0.0141221	0.0192952	0.0177995	0.0166006	0.0165293	0.0161383	0.00630349	0.00674861	0.00579056	0.0166529	0.0150304	0.0164349	0.0153309	0.00824511	0.00991456	0.0244384	0.0240821	0.0241685	0.00565931	0.00363047	0.00362435	0.0148942	0.00967344	0.0165598	0.00931886	0.0116885	0.00311954	0.00379911	0.00562522	0.00323067	0.00398817	0.00416363	0.00410519	0.00468968	0.00161404	0.0117563	0.014008	0.0165115
ko00770	0.0159781	0.0154955	0.0166072	0.0164075	0.0169274	0.016569	0.016259	0.0147825	0.0143128	0.014006	0.0149848	0.0159429	0.0155244	0.0158872	0.0152491	0.0160972	0.0106551	0.0109179	0.0106839	0.0152297	0.0155824	0.0145094	0.0167291	0.0146113	0.0154553	0.0153197	0.0150289	0.0156102	0.0137734	0.0146379	0.0133881	0.0127661	0.0178236	0.0177841	0.0157495	0.0149476	0.0161549	0.0158237	0.0159905
ko00670	0.015903	0.0155793	0.0164227	0.0158877	0.0152638	0.0152952	0.0158795	0.0125215	0.0127408	0.0129811	0.0178343	0.0178803	0.017805	0.0181729	0.0149197	0.0138719	0.0205792	0.0203199	0.0203758	0.0147532	0.0123098	0.0123177	0.015117	0.0151754	0.0149785	0.0141649	0.0135528	0.0138689	0.0129304	0.0130298	0.0125257	0.0107451	0.0147218	0.0146685	0.0151354	0.016476	0.0134329	0.0142236	0.0146315
ko00550	0.0153967	0.0131101	0.0176155	0.0180573	0.0177211	0.0167536	0.0182202	0.0125987	0.0118472	0.0118432	0.0187041	0.0184974	0.0186863	0.0190816	0.0160912	0.0144281	0.022068	0.0218179	0.0218524	0.0167117	0.0143509	0.0177843	0.0149355	0.0145186	0.0165204	0.014657	0.0144669	0.0160496	0.0138343	0.0138803	0.0137361	0.0113775	0.016994	0.0168877	0.0177403	0.0205967	0.0140047	0.0149782	0.0159139
ko00521	0.0150718	0.0122757	0.0181798	0.0170293	0.0124739	0.0127883	0.0171001	0.0138096	0.0140838	0.013657	0.0170061	0.0170998	0.0173014	0.0173538	0.0143902	0.0124198	0.0175813	0.0176019	0.0174918	0.0155615	0.0169041	0.0101006	0.0146307	0.0119931	0.0154411	0.0153589	0.0143582	0.0192168	0.0147249	0.016012	0.0138292	0.0141714	0.010543	0.0108632	0.0134478	0.012012	0.0152089	0.016355	0.0174854
ko00473	0.0149162	0.0119158	0.0184803	0.0190573	0.0181574	0.0196083	0.0192402	0.0127409	0.0115272	0.0112871	0.0194688	0.0182366	0.0191809	0.0190249	0.0158552	0.0146368	0.0261247	0.0256037	0.0258047	0.0190293	0.0185805	0.0202769	0.0137526	0.013463	0.0176933	0.0178039	0.0157933	0.0254965	0.0150478	0.0140518	0.0148784	0.0109147	0.0208798	0.0206761	0.0204682	0.0236432	0.0144416	0.0157861	0.0176236
ko00072	0.0148652	0.0205873	0.00803229	0.00653734	0.0027777	0.00573489	0.00677976	0.0180867	0.0222939	0.0253152	0.00808967	0.00740475	0.00792352	0.00677327	0.016079	0.016282	0.00435728	0.00651076	0.00650198	0.0123964	0.0159822	0.0109738	0.0123803	0.0196941	0.0123054	0.0185659	0.017891	0.0149683	0.0207877	0.0203728	0.022792	0.0260515	0.0118731	0.0118235	0.013325	0.0135336	0.016299	0.0145401	0.012738
ko00250	0.0143327	0.0140976	0.0145153	0.0147469	0.0153058	0.0147923	0.014829	0.0128971	0.0131001	0.0128211	0.0159284	0.0162899	0.0158907	0.0164898	0.0133776	0.0135253	0.017476	0.0172955	0.017319	0.0147344	0.0143887	0.0151702	0.0142252	0.0140289	0.0131832	0.0135836	0.0126064	0.0161032	0.0135406	0.0131816	0.0134712	0.0119334	0.0137832	0.0135744	0.0143143	0.0155514	0.0126675	0.0128972	0.0134014
ko02030	0.0142464	0.0106896	0.0128789	0.0122574	0.0140299	0.0149055	0.0139728	0.0174003	0.0103289	0.0103315	0.00919916	0.00917693	0.00985464	0.0100097	0.0136572	0.0137606	0.00224301	0.00291724	0.0023594	0.010401	0.00989564	0.023929	0.025964	0.0197432	0.0177928	0.0139029	0.0138583	0.0075466	0.00802384	0.00596739	0.00723208	0.0079793	0.00622779	0.00652594	0.00905289	0.00434653	0.0150973	0.0172334	0.0152435
ko00730	0.0139284	0.0132365	0.0148255	0.0150466	0.0135545	0.0150861	0.0153437	0.0102799	0.0106352	0.010546	0.0157345	0.0148569	0.0153124	0.015691	0.0110578	0.0111633	0.0213944	0.0210446	0.021134	0.0121551	0.0114941	0.0125841	0.0116327	0.0117328	0.0126594	0.0102458	0.0115038	0.00982692	0.00986819	0.0110905	0.0101006	0.0092469	0.0157168	0.0152845	0.013834	0.0203572	0.0109383	0.0112433	0.0121718
ko00710	0.0137892	0.0125778	0.0151627	0.015297	0.015122	0.0146334	0.0152065	0.0107133	0.0101857	0.00948954	0.0161197	0.0158149	0.0160957	0.016314	0.0132354	0.0120472	0.0189278	0.0187116	0.0187459	0.0135495	0.0118013	0.0142268	0.0135368	0.0107342	0.0124384	0.0121792	0.0121608	0.0125336	0.0105786	0.0110747	0.0101893	0.00931807	0.0131793	0.0131414	0.0134343	0.011242	0.0122998	0.0122668	0.013178
ko00970	0.0136967	0.0114364	0.0159949	0.0160958	0.0140795	0.0144439	0.0164952	0.0113161	0.0116386	0.0114129	0.0179321	0.017355	0.0180193	0.017942	0.0136867	0.0131848	0.0212651	0.0209488	0.0210361	0.0153478	0.0127869	0.0145241	0.0135999	0.0129452	0.0150224	0.0133385	0.0134565	0.0136407	0.0128315	0.0127471	0.0127292	0.0105617	0.0146006	0.0145711	0.0160654	0.0182704	0.013553	0.0139076	0.0148191
ko00790	0.0136814	0.0141278	0.0130245	0.012829	0.0140366	0.0135686	0.0125893	0.010695	0.0109579	0.0114085	0.01214	0.0129513	0.0118683	0.012068	0.0107901	0.0112975	0.0131677	0.0131883	0.0130978	0.0111169	0.011478	0.0107692	0.0132059	0.0127869	0.0122663	0.0113484	0.0108284	0.0138758	0.0106999	0.0109544	0.0100682	0.00949489	0.0145132	0.0145367	0.0124878	0.0117115	0.0105774	0.01105	0.0118554
ko00030	0.0136808	0.0115044	0.0162717	0.0167851	0.0164508	0.0159725	0.0163673	0.0118096	0.0115244	0.0105392	0.0158514	0.0154422	0.0157035	0.016171	0.0143842	0.0121373	0.0190978	0.0189557	0.0189353	0.0159429	0.0151741	0.0135488	0.0131796	0.0127865	0.0130707	0.0129841	0.012696	0.0173712	0.013418	0.0132487	0.0133608	0.0109868	0.0161409	0.0160162	0.0167468	0.0187308	0.0122844	0.0127098	0.0139427
ko00300	0.0132674	0.0121609	0.0146615	0.0145349	0.0136117	0.01392	0.0144326	0.0113508	0.0108844	0.0108474	0.0147548	0.0148508	0.014894	0.0153248	0.0124693	0.0121526	0.0157703	0.0156937	0.0156501	0.0140388	0.0125224	0.0125933	0.0128002	0.0128785	0.0126131	0.0121311	0.0123742	0.0134197	0.0122552	0.0121904	0.0119838	0.0110284	0.0137373	0.0138377	0.0140716	0.018716	0.0122489	0.0129287	0.0135642
ko03010	0.0129277	0.0116332	0.0143311	0.01422	0.0124001	0.0130078	0.0146797	0.0102224	0.0103894	0.010415	0.0166296	0.0163975	0.0168346	0.0169187	0.0123164	0.0119264	0.0189048	0.0186353	0.0187088	0.0143587	0.0120946	0.0123667	0.0128532	0.0120976	0.0135502	0.0119595	0.0118056	0.0132006	0.0120512	0.0119074	0.011913	0.00960044	0.0146646	0.0145283	0.0155597	0.017732	0.0118104	0.0122981	0.01306
ko00450	0.012616	0.013677	0.0120487	0.011884	0.012956	0.0127258	0.0114803	0.0117658	0.0109066	0.0105418	0.00934955	0.00960386	0.00934492	0.00927409	0.0100701	0.0109876	0.00883977	0.00901233	0.00882219	0.0104916	0.0114779	0.0115571	0.0117528	0.0113684	0.0102694	0.0105796	0.0101103	0.0108318	0.0111436	0.0115619	0.0111655	0.011843	0.0109962	0.0108523	0.0103801	0.0102123	0.0108157	0.0107102	0.0111545
ko03060	0.0125177	0.011311	0.0132772	0.0131149	0.0133451	0.0131241	0.0131553	0.0106861	0.0108247	0.0108508	0.0146917	0.0147327	0.0148063	0.0149676	0.0118651	0.0124201	0.0157348	0.0156015	0.0155923	0.0130984	0.0133864	0.0116545	0.0139988	0.0128865	0.0138155	0.0126837	0.0116017	0.0149913	0.0121838	0.0119718	0.0116389	0.0099749	0.0155203	0.0154641	0.0144941	0.0151097	0.0116908	0.012098	0.0122044
ko00620	0.0123731	0.0119099	0.0127644	0.0128745	0.0130937	0.013642	0.012715	0.0125345	0.0127383	0.0127991	0.0123124	0.0119895	0.0122456	0.0122588	0.0131218	0.0124432	0.0134961	0.0134447	0.0133888	0.0130156	0.0128221	0.0126787	0.012903	0.0134351	0.0122853	0.013141	0.0125418	0.0127964	0.0128858	0.0131052	0.0134841	0.0128025	0.0152606	0.0151812	0.0144551	0.0165215	0.0119244	0.011937	0.0119464
ko00720	0.0122817	0.0135541	0.010899	0.0105138	0.0120122	0.011716	0.0103471	0.0112691	0.0116361	0.0118475	0.0112217	0.0120321	0.0113556	0.0113887	0.0107503	0.0117562	0.0100722	0.0100973	0.0100193	0.0105975	0.0110053	0.0108085	0.0123889	0.012146	0.0118182	0.0118623	0.0114163	0.0106573	0.0119454	0.0118186	0.0117904	0.0123633	0.0119535	0.011669	0.0110029	0.0101099	0.0116869	0.01104	0.0111204
ko00785	0.0122158	0.0155102	0.00713164	0.00663523	0.01188	0.0102068	0.00625296	0.0119276	0.0115497	0.0115855	0.00937422	0.0108281	0.0107693	0.0101824	0.0132976	0.0141226	0.00013816	0.00052892	0.00027293	0.0136722	0.014995	0.00802943	0.016279	0.0139084	0.0145692	0.0143107	0.0104404	0.0163732	0.012405	0.0115899	0.0105757	0.011013	0.0207808	0.0200862	0.0167475	0.0257803	0.0127844	0.0104979	0.0093004
ko00270	0.0121607	0.0120428	0.0125759	0.0127673	0.0119147	0.0120903	0.0129546	0.00949166	0.00927791	0.00909586	0.0111087	0.0112099	0.0110448	0.011425	0.0098084	0.0100083	0.0119832	0.0120197	0.0119131	0.0105059	0.0102851	0.0122827	0.0103513	0.0104651	0.010117	0.0102269	0.0103628	0.0113334	0.00935334	0.009679	0.00933214	0.00825	0.0106538	0.0106012	0.0107309	0.0105351	0.00984996	0.0110154	0.0112983
ko00340	0.0114711	0.0133099	0.00941349	0.00842479	0.00882249	0.00976661	0.00886725	0.0109771	0.0108273	0.0104895	0.0102551	0.0110289	0.0104111	0.0108915	0.0104203	0.0109473	0.00831646	0.00834845	0.00827366	0.00918713	0.0121648	0.0107569	0.0129685	0.0112839	0.0113537	0.0120585	0.0104306	0.0131477	0.0106603	0.0110808	0.0100837	0.0107691	0.0118463	0.0110332	0.0100271	0.0052614	0.0106858	0.010326	0.00989105
ko03030	0.0111904	0.0108716	0.0117381	0.0117748	0.0111272	0.0114944	0.0119054	0.00825215	0.00840241	0.00811092	0.0126722	0.0123668	0.0126581	0.012746	0.00978289	0.00942693	0.01511	0.0149234	0.0149542	0.0114438	0.0099252	0.00996697	0.0108065	0.0104141	0.0108659	0.00973674	0.00947932	0.011286	0.00996018	0.00964224	0.00962352	0.00787773	0.0116288	0.0115209	0.0122799	0.0136929	0.00939338	0.00981844	0.0105255
ko00020	0.0111653	0.0126516	0.00907925	0.00859069	0.0123707	0.010501	0.0080588	0.011514	0.011396	0.0113028	0.0086276	0.0098807	0.00876419	0.00877245	0.00958895	0.0118874	0.00590832	0.00606461	0.00591976	0.0101352	0.0148381	0.00988316	0.0121729	0.0120806	0.0115554	0.0129303	0.0107034	0.0158992	0.0129976	0.0124614	0.0124797	0.0121623	0.0130179	0.0129019	0.010189	0.00840102	0.011285	0.00963813	0.00953382
ko00900	0.0111238	0.0100292	0.0121903	0.0121383	0.0105538	0.0109	0.0126467	0.0108086	0.0119929	0.0123218	0.0141398	0.0137455	0.0142116	0.014224	0.0115923	0.0113038	0.015994	0.0157587	0.0158246	0.0124227	0.0123484	0.0123344	0.0114259	0.0122657	0.0116176	0.0114622	0.0115993	0.013278	0.0134141	0.0135312	0.0136617	0.0127253	0.0132178	0.0129151	0.0135356	0.014736	0.0115078	0.0115309	0.0119151
ko00260	0.0107519	0.012242	0.00897	0.00880685	0.0108826	0.0109544	0.00864343	0.0111363	0.0107404	0.0101119	0.010015	0.0103542	0.010057	0.0101699	0.0113023	0.0109024	0.00927577	0.00927171	0.00920986	0.0108525	0.0119821	0.00888158	0.0113405	0.0121527	0.00912288	0.0108455	0.00960448	0.0123814	0.0106521	0.0103373	0.0102932	0.0102064	0.0120606	0.0119473	0.0110375	0.00868224	0.0112112	0.0096587	0.00931634
ko00010	0.0106291	0.00979699	0.0116974	0.0117652	0.0115692	0.0116232	0.0115984	0.0103666	0.0106935	0.0102036	0.0107703	0.010616	0.0107229	0.0107841	0.0111032	0.0103404	0.0118467	0.011837	0.0117678	0.0124432	0.012918	0.0113375	0.00965798	0.0112541	0.00970931	0.0110887	0.0107162	0.0141552	0.0118581	0.0115775	0.01247	0.0105062	0.0139414	0.0140074	0.0134027	0.0139756	0.0100585	0.0103069	0.0105666
ko00240	0.0103864	0.00921956	0.0119022	0.0119662	0.011047	0.0115486	0.0120042	0.00798748	0.00794972	0.00772852	0.0113667	0.0113401	0.0113341	0.0115194	0.00984953	0.00906033	0.0129644	0.0128966	0.012864	0.0110731	0.00905554	0.0103674	0.00974132	0.00947004	0.010086	0.00926653	0.00944942	0.0101592	0.00894682	0.00881505	0.00893455	0.00698566	0.0105551	0.0105986	0.0116066	0.0135821	0.00901807	0.00968202	0.0105159
ko00750	0.0102605	0.0107468	0.00950007	0.00933479	0.013096	0.0114591	0.00879676	0.00967421	0.00888756	0.00918229	0.0103974	0.0110428	0.0105103	0.0107777	0.0093525	0.0106652	0.00985775	0.00984391	0.00979527	0.0104679	0.0109653	0.00622423	0.0115848	0.0110943	0.00999523	0.0100402	0.00854829	0.01195	0.01022	0.00959629	0.00920547	0.00878614	0.0098298	0.00971313	0.00987373	0.00688048	0.00971458	0.00908287	0.00928327
ko00983	0.0101813	0.00863484	0.0123799	0.0129431	0.0135998	0.0124759	0.012655	0.00931909	0.00911805	0.00871962	0.0126608	0.0128107	0.012638	0.0129369	0.0102272	0.00923327	0.0143306	0.0142578	0.014219	0.0115837	0.0112332	0.0123644	0.0101452	0.0100536	0.00939236	0.011247	0.00941487	0.0134917	0.0111258	0.0107215	0.0112546	0.00866847	0.0112077	0.0113674	0.0114974	0.00915986	0.00882153	0.00976428	0.0102035
ko00400	0.0101541	0.0107901	0.00890554	0.00866383	0.0105925	0.00982573	0.00864524	0.00906186	0.00902375	0.00901191	0.0099086	0.010591	0.00996543	0.0104189	0.00855152	0.00980896	0.00849326	0.00851582	0.00844733	0.00882338	0.0102424	0.0087075	0.0114379	0.00990741	0.0105558	0.00998376	0.00879774	0.010538	0.0086292	0.00883963	0.00817905	0.0080973	0.0107551	0.0106116	0.00913631	0.00488409	0.00949079	0.00907484	0.00913339
ko00760	0.0100595	0.00839939	0.0109403	0.0108239	0.0115352	0.0118825	0.0106652	0.0101812	0.0101069	0.00959032	0.011331	0.0114661	0.0113653	0.0114501	0.0106204	0.0106094	0.0116902	0.0116798	0.0116094	0.0109388	0.0115995	0.0102777	0.0115539	0.010886	0.0119131	0.0109561	0.0107258	0.0118786	0.0104652	0.0102806	0.0106224	0.00977265	0.00887261	0.00890422	0.00953849	0.0102004	0.0100713	0.0105767	0.0105818
ko00920	0.00998737	0.0108777	0.00868432	0.0085465	0.0103929	0.010855	0.00804116	0.00963886	0.00896527	0.00940699	0.00655631	0.00665584	0.00631769	0.00652152	0.00748352	0.00881865	0.00662471	0.00677734	0.00660356	0.00751232	0.00726221	0.00689145	0.0110172	0.0108515	0.0079238	0.00775206	0.00752249	0.00608539	0.00744973	0.00766515	0.00723989	0.00815948	0.010327	0.0101389	0.00865606	0.00676503	0.00839381	0.00846673	0.00844839
ko00640	0.00998267	0.0107716	0.00944368	0.00908206	0.00810073	0.00924506	0.00907152	0.0115429	0.012945	0.0136755	0.00914872	0.00882406	0.00911721	0.00870344	0.0106769	0.0100283	0.0095611	0.00952613	0.00948972	0.00931356	0.0105483	0.00982337	0.00934995	0.0114855	0.00889043	0.0103915	0.0108115	0.0090986	0.0118051	0.012024	0.0126008	0.0138153	0.00966992	0.00944577	0.00951517	0.00985882	0.0103424	0.00990803	0.00965136
ko00280	0.00965036	0.0133634	0.00549783	0.00408449	0.00401985	0.0047804	0.00465655	0.0125756	0.0143328	0.0151452	0.00648879	0.00660353	0.00642942	0.00573151	0.0112886	0.0108145	0.00453227	0.00455051	0.00450348	0.0077786	0.011087	0.00925597	0.0101848	0.0125841	0.00745669	0.0116284	0.0107679	0.00965575	0.0131199	0.0131651	0.0140541	0.0164172	0.00770052	0.0076657	0.00721906	0.0064237	0.0114929	0.00950752	0.00812031
ko03070	0.00935584	0	0.00881837	0.0085976	0.0134535	0.0124993	0.00766934	0	0	0	0.00815219	0.00803574	0.00806071	0.00808694	0	0	0.0092475	0.00930169	0.0091783	0.00805341	0.00710744	0.00579235	0.010743	0.0120096	0.0108582	0	0.00922284	0.00740078	0.00653967	0.0062208	0.00625159	0.00564283	0.00765348	0.00771679	0.00807223	0.00675524	0	0.00919812	0.00856192
ko00740	0.0090188	0.00807534	0.00984617	0.0104312	0.0115231	0.0102665	0.0100138	0.00677721	0.00672606	0.0062853	0.0105877	0.0103995	0.0104817	0.010518	0.00631806	0.00753267	0.0130933	0.0129269	0.0129607	0.00590716	0.0064282	0.00797359	0.00848792	0.00808609	0.00892986	0.00725347	0.00830036	0.00662948	0.00645739	0.00714535	0.00593057	0.00624107	0.00699346	0.00688363	0.00621317	0.00368288	0.00747068	0.00854736	0.00891299
ko00650	0.00899535	0.00869888	0.00903263	0.00936951	0.0104698	0.0100952	0.00887638	0.0116813	0.0124711	0.0131895	0.00830775	0.00801426	0.00803977	0.00767673	0.00991674	0.0102756	0.00976539	0.00974235	0.00968605	0.00918885	0.0111645	0.00953113	0.0083167	0.0110183	0.00896206	0.0115563	0.0109226	0.0108069	0.0121123	0.0120323	0.0128971	0.0137528	0.00887122	0.00891653	0.00859228	0.00910237	0.0101093	0.00989249	0.009452
ko00480	0.00886204	0.00827587	0.00816574	0.00800009	0.0116467	0.0103555	0.00711462	0.00990148	0.00813634	0.00804657	0.00521625	0.00567955	0.00514051	0.00497358	0.0113543	0.0112497	0.00288686	0.00320486	0.00295323	0.00886504	0.0093049	0.0072877	0.0117374	0.0130283	0.0108295	0.0110152	0.010225	0.00932872	0.00785077	0.007312	0.0081681	0.00849912	0.00709923	0.00717497	0.00789718	0.0105492	0.0107587	0.0107409	0.0092339
ko00281	0.00882964	0.0121326	0.00392867	0.00313704	0.00373786	0.00648552	0.00295424	0.0146905	0.0193916	0.0207693	0.00318936	0.00357109	0.0031179	0.00258541	0.00887889	0.0112803	7.96e-05	0.00032955	0.00013747	0.00588763	0.00921138	0.00637651	0.0101618	0.0152455	0.00698368	0.00929498	0.0110591	0.00538898	0.0147403	0.0143333	0.0162316	0.0208441	0.00265509	0.00283363	0.00376496	0.00186171	0.0100373	0.00795194	0.00576239
ko00520	0.00874088	0.00789381	0.00985516	0.0104779	0.0113609	0.0102751	0.0101243	0.00732953	0.00663253	0.00636912	0.00969196	0.00976084	0.00957577	0.00993646	0.00798968	0.00760249	0.0116683	0.0115843	0.0115694	0.00954339	0.00802711	0.00958484	0.0076309	0.00771827	0.00684062	0.00746502	0.00749628	0.00935701	0.0079677	0.00773013	0.00808582	0.00619177	0.00913372	0.00921145	0.00981282	0.0111539	0.0073998	0.00830894	0.00868418
ko03410	0	0	0	0	0	0	0.00886385	0	0	0	0	0	0	0	0	0	0	0	0	0.00985985	0	0	0	0	0	0	0	0.0121325	0.0109088	0	0.0107532	0	0.00910413	0.00909414	0.00955856	0.0116775	0	0	0
ko00511	0.00845504	0.015594	0.00301349	0.00205563	0.00211181	0.00266787	0.00311446	0.00229955	0.00123432	0.00132916	0.00526328	0.00873541	0.005619	0.00815228	0.00256978	0.003714	8.03e-05	0.00022906	0.00020759	0.00487022	0.00166297	0.0037374	0.00371674	0.00134305	0.00084266	0.00225302	0.00152003	0.00427775	0.00308637	0.00190098	0.00144388	0.00085216	0.00508966	0.00532253	0.00446387	0.00535894	0.00173138	0.00197388	0.00208277
ko00860	0.00809998	0.00725845	0.00969725	0.00996257	0.00882182	0.00793604	0.00988293	0.0066693	0.00717888	0.00737048	0.00999594	0.00924994	0.00947604	0.00924162	0.00691663	0.00651037	0.0147801	0.0144695	0.0145906	0.00460649	0.00572935	0.00939087	0.00707794	0.00606445	0.00806873	0.0072272	0.00794913	0.00560802	0.0060576	0.00701813	0.00552723	0.00638681	0.00583158	0.00575387	0.00479914	0.00236276	0.00785562	0.00838722	0.00876432
ko03020	0.00809538	0.00819756	0.0079982	0.00762323	0.00596595	0.00681352	0.00843523	0.00745133	0.00726183	0.0071289	0.0094291	0.00979732	0.00938466	0.00983286	0.00687235	0.00733364	0.00961391	0.00951717	0.00953081	0.00760323	0.00763136	0.0115312	0.00866293	0.00722763	0.00793316	0.00730445	0.0070885	0.00821659	0.00746715	0.00775449	0.007062	0.00665815	0.00687311	0.0068442	0.00720515	0.00637903	0.00781645	0.00821588	0.00815135
ko00430	0.00805339	0.0101987	0.00653926	0.00658555	0.00692523	0.0069047	0.00696877	0.00772563	0.00770029	0.00694862	0.00678015	0.00685926	0.00679623	0.00680516	0.00763181	0.00871017	0.00658193	0.00660235	0.00654324	0.00772049	0.00874328	0.00978018	0.00898493	0.00911526	0.00606887	0.00832839	0.00756257	0.00973616	0.00848307	0.00825521	0.00900033	0.00987455	0.00845102	0.00836417	0.00843503	0.0109411	0.00897266	0.00705021	0.00717683
ko00230	0.00801104	0.00704353	0.00884496	0.00907254	0.00936302	0.00910232	0.00895624	0.00743439	0.00721177	0.00706468	0.00861125	0.00852986	0.00855156	0.00862271	0.00813323	0.00771654	0.0097122	0.00966265	0.00963194	0.00905923	0.0077079	0.00844446	0.00825755	0.00835525	0.00829958	0.00779342	0.00758264	0.00823502	0.00759778	0.00750444	0.00772387	0.00642599	0.00871569	0.00870192	0.00944112	0.0110851	0.00748839	0.00773079	0.00794254
ko00500	0.007905	0.00718374	0.00923921	0.0093341	0.00861953	0.00767008	0.00902347	0.00635362	0.00580212	0.00558002	0.00786605	0.00823675	0.00776352	0.00832664	0.00691375	0.00646083	0.00858655	0.00863307	0.00855224	0.00784585	0.00727447	0.00709272	0.00588158	0.00583332	0.00586172	0.00658625	0.00681215	0.00938978	0.00702585	0.00692457	0.00658527	0.00559788	0.00753855	0.00775138	0.00773557	0.00716587	0.00636707	0.00733074	0.00790236
ko00630	0.0076014	0.00931033	0.00517486	0.00508346	0.00752622	0.00643732	0.00476494	0.00989006	0.00974099	0.00963907	0.00576609	0.00617466	0.00566618	0.00565086	0.00898313	0.00947011	0.00400131	0.00406245	0.00399037	0.00725104	0.00866277	0.00667006	0.00867515	0.00964185	0.00827549	0.0101377	0.00895708	0.00757777	0.00825796	0.00812089	0.0080933	0.00929969	0.00667676	0.0067394	0.00632983	0.00396423	0.0094554	0.00863501	0.0071866
ko02040	0.00746386	0.00652068	0.00648451	0.00755811	0.0133715	0.0113475	0.00740552	0.0111416	0.00757908	0.00698402	0.00644039	0.00631144	0.00726748	0.00729967	0.00915425	0.0100862	0.00016385	0.00066518	0.00027516	0.00603941	0.00748434	0.0158407	0.0151237	0.0135183	0.0150431	0.0124869	0.00980318	0.0110086	0.00700167	0.00428921	0.00690813	0.00444821	0.00365506	0.0037754	0.00479295	0.00240775	0.00947671	0.011743	0.00868411
ko00071	0.00740916	0.00853837	0.00577188	0.0051164	0.00532774	0.00635951	0.00503871	0.0131687	0.0158047	0.0165741	0.00623053	0.00597916	0.00612913	0.00551559	0.00998602	0.0101562	0.00547566	0.00547332	0.00543328	0.00782913	0.0109173	0.00803028	0.00767069	0.0111489	0.00735345	0.0102822	0.0107978	0.00832928	0.0137013	0.0139395	0.0150491	0.0179284	0.0057461	0.00581812	0.0061571	0.00587765	0.0103673	0.00889744	0.00766541
ko00330	0.00729001	0.008384	0.00630828	0.00655326	0.00713986	0.00715888	0.00698804	0.00817371	0.00764029	0.00759441	0.00657955	0.00700502	0.00659193	0.00678991	0.00784012	0.0076892	0.00545019	0.00550775	0.00543411	0.00744137	0.00837193	0.0113577	0.00799809	0.00876622	0.00635993	0.00782083	0.00678551	0.00786768	0.0071553	0.00707515	0.00693812	0.00787991	0.00769587	0.00766756	0.00728897	0.00644269	0.007568	0.00669351	0.00636194
ko00910	0.00701854	0.00779731	0.00661526	0.00699091	0.00881162	0.00712254	0.00663876	0.00652556	0.00648663	0.00581616	0.00579484	0.00583012	0.00558449	0.00574578	0.00552198	0.0060945	0.00683572	0.00681528	0.00678596	0.00561583	0.00501928	0.00744511	0.00609966	0.00702301	0.00548717	0.00529058	0.00588891	0.00488612	0.00539584	0.00563863	0.0052927	0.00570872	0.006429	0.00632507	0.00595258	0.00526708	0.00578164	0.00604512	0.00607055
ko02010	0.00697118	0.00467909	0.00920942	0.00987925	0.0104279	0.0105795	0.009224	0.010767	0.00837649	0.00848052	0.00804634	0.00756611	0.0077583	0.00746403	0.0117991	0.00980059	0.00953201	0.00954289	0.00946225	0.00988559	0.0118957	0.0105061	0.00633793	0.00840222	0.00719818	0.0110784	0.00994679	0.0123209	0.00822631	0.00817909	0.00774776	0.00864407	0.00773735	0.00782805	0.00847473	0.00783969	0.00953148	0.00966933	0.00879975
ko00130	0.00641514	0.00732937	0.00450267	0.00473903	0.0100404	0.00857194	0.00373899	0.00608718	0.00552723	0.00520377	0.00260215	0.00333533	0.0026264	0.00255368	0.00463474	0.00695015	0.00010705	0.00042021	0.00018558	0.00458815	0.0061353	0.00348512	0.00775132	0.00846221	0.00667699	0.00580085	0.0052023	0.00602074	0.00520456	0.00517446	0.00502237	0.00542592	0.00646991	0.00631284	0.00481656	0.00318023	0.00612263	0.00516107	0.00487226
ko00040	0.00625138	0.00718728	0.00545143	0.00588666	0.00735865	0.00566161	0.00538495	0.00627074	0.00582442	0.0053293	0.00553844	0.00595659	0.00559246	0.00606943	0.0066563	0.00582938	0.00408698	0.00416483	0.00409817	0.00603649	0.0072057	0.00644448	0.00530245	0.00386249	0.0044232	0.00650783	0.00521994	0.00816327	0.00539033	0.00537311	0.00515363	0.00503208	0.00775204	0.00810497	0.00610785	0.00623621	0.00571083	0.00594361	0.00553299
ko00051	0.00620405	0.0054449	0.0075586	0.00816921	0.00752638	0.00777987	0.00814822	0.00583468	0.00569426	0.00534194	0.00831834	0.0081913	0.00807279	0.00844796	0.00703486	0.00588879	0.0111056	0.0109375	0.0109857	0.00812168	0.00723461	0.00646446	0.00431626	0.00545493	0.00445352	0.00575812	0.00576176	0.00801292	0.00647444	0.00637044	0.00684854	0.00537111	0.00827078	0.00836609	0.00862917	0.00812196	0.00551336	0.00626775	0.00662727
ko00460	0.00610601	0.0108831	0.00172174	0.00149563	0	0	0.00140673	0.0049806	0.00544438	0.00549026	0.00628679	0.00701407	0.00620533	0.00626246	0.00651937	0.00726956	0	0	0	0.00627246	0.00880265	0.00259979	0	0.00744072	0.00573747	0.00723288	0.00672499	0.00953998	0.00741488	0.00723161	0.00754172	0.00791238	0.00490455	0.00496346	0.00642841	0.00420561	0	0	0
ko03018	0.00594269	0.00580391	0.00598111	0.00594359	0.00612908	0.00604645	0.00600978	0.00498534	0.00476882	0.00473673	0.00607092	0.00614488	0.00610036	0.00616536	0.00538164	0.00560588	0.00622577	0.00620631	0.00618123	0.00560503	0.00540841	0.00528865	0.00647474	0.00583941	0.0061335	0.00563482	0.00513301	0.00566609	0.00517654	0.00501147	0.00498793	0.00442293	0.00625278	0.00616398	0.00599314	0.00659745	0.00575706	0.00555973	0.00569166
ko00410	0.00591872	0.00792523	0.0035567	0.00389355	0	0.00451715	0.00559241	0.0113185	0.0124323	0.0135563	0.00478271	0.00524048	0.00467864	0.00448765	0.00856798	0.00865955	0.00057255	0	0	0.00644761	0.00810093	0.0105852	0.00738315	0.00943373	0.00607849	0.00784962	0.00844109	0.00645637	0.0101286	0.01063	0.010653	0.0135399	0.00653041	0.00645848	0.00569401	0.0028973	0.00811956	0.00711343	0.00606917
ko00564	0.00575773	0.00474199	0.0065074	0.00707803	0.00820488	0.00760249	0.00653779	0.00569427	0.005129	0.00503578	0.00627548	0.00591708	0.00614906	0.00605853	0.0056778	0.00579251	0.00786872	0.00781038	0.00778919	0.00608205	0.00547405	0.00608666	0.00602253	0.00651455	0.00638042	0.00582448	0.00595046	0.00572318	0.00543024	0.00543939	0.0054995	0.00497301	0.00614276	0.00613185	0.00618707	0.00654321	0.00558353	0.0062033	0.00603539
ko00052	0.00571904	0.00593205	0.00633899	0.00727546	0.008553	0.00591458	0.00707466	0.00598086	0.00485483	0.00487968	0.00679829	0.00740262	0.00670898	0.00753662	0.00770183	0.00557757	0.00725824	0.0072303	0.00721721	0.00903524	0.00718603	0.00935605	0.0045578	0.0054859	0.00431236	0.00564134	0.00523382	0.00932579	0.00699755	0.00612257	0.00705337	0.00527809	0.00996326	0.0101398	0.0102902	0.00936017	0.00478014	0.00547956	0.00568056
ko01040	0.0056933	0.00611993	0.00475537	0.00447528	0.0059733	0.00687892	0.00425032	0.0089614	0.00897086	0.00942762	0.00408922	0.00428544	0.00419963	0.00398167	0.00674912	0.00743501	0.00181214	0.00197813	0.00183932	0.00586433	0.00827427	0.00622778	0.0073681	0.00835388	0.0060056	0.00676564	0.00625376	0.0063744	0.00809226	0.00814673	0.00886849	0.0104201	0.00447747	0.00444991	0.0047808	0.00385651	0.00693231	0.00576035	0.00522894
ko00380	0.00540505	0.00724989	0.00341364	0.00288039	0.00366359	0.00338641	0.0028821	0.00760033	0.00874974	0.00902571	0.00324403	0.00325148	0.00321516	0.00284345	0.0063235	0.00642928	0.00172219	0.00179131	0.00173062	0.00484448	0.00731933	0.00539074	0.00533604	0.00762943	0.00535145	0.00684577	0.00639078	0.00596108	0.00785721	0.00802495	0.00851505	0.00977721	0.00513894	0.00501619	0.00468142	0.00380436	0.00689987	0.00587622	0.0050701
ko00360	0.0053601	0.00695222	0.00396992	0.00362339	0.00399251	0.00384647	0.00368327	0.00693478	0.00637761	0.00597888	0.00368962	0.00372153	0.00359235	0.00346012	0.00562234	0.00549591	0.00305053	0.00308312	0.00304399	0.00427432	0.00554889	0.00573352	0.0053303	0.00545883	0.00516498	0.00604564	0.00619355	0.00485557	0.00625793	0.00618029	0.00659683	0.00832713	0.00285252	0.00286648	0.00345941	0.00301876	0.00597067	0.00557735	0.00490276
ko00190	0.00526413	0.00578895	0.00434008	0.00390242	0.00529153	0.00481864	0.0036267	0.00501847	0.00505178	0.00493156	0.00506253	0.00526377	0.00509236	0.00498952	0.00488501	0.00566138	0.00458261	0.00455464	0.00454301	0.00489967	0.00505485	0.00385833	0.00581537	0.00512991	0.00675529	0.00563695	0.0049981	0.00451179	0.00496919	0.00506762	0.0047361	0.00493986	0.00467621	0.00462432	0.00445378	0.00387175	0.00573254	0.00523895	0.00490385
ko00960	0.00498043	0.00570922	0.00410827	0.00358021	0	0.00329664	0.00421334	0.0057108	0.00465747	0.00483935	0.00464665	0.0047267	0.00465328	0.00458318	0.00415307	0.00467616	0	0.00143466	0.00287956	0.00388448	0.00440498	0.00619363	0.00493414	0.00451238	0.00490753	0.00504844	0.00491418	0.00457325	0.00475692	0.00454076	0.0045482	0.00499105	0.00325729	0.00313299	0.00315482	0.00137009	0.00471965	0.00487756	0.00442439
ko00643	0.00403739	0.00586921	0.0026758	0.00091893	0	0.00195368	0.00220026	0.00486831	0.00464236	0.00446951	0.00478821	0.00383923	0.00379949	0.00331437	0.00440535	0.00444961	0.00283701	0	0	0.00325013	0.00485328	0.00424703	0.00284819	0.00525733	0.00425734	0.00480938	0.00539491	0.00424656	0.00534303	0.00518286	0.00580297	0.00729119	0.00106593	0.00121901	0.0023211	0.00262207	0.00571858	0.00413046	0.0038466
ko00642	0.00267198	0.00557597	0	0.00104837	0	0	0	0	0	0	0	0	0	0	0.00304072	0.00376664	0	0	0	0.0023893	0.00159946	0.0005309	0	0	0.00241906	0.00237905	0.00670927	0.00157926	0.00083171	0.00320842	0.00275853	0.00089347	0.00154186	0.00183417	0.00232045	0.00185191	0.00232169	0.00175596	0
ko00310	0.00455808	0.00552718	0.00323485	0.00275525	0.00310912	0.00288279	0.0026914	0.00687573	0.00789033	0.00856075	0.00251415	0.00255586	0.00249208	0.00219607	0.00530525	0.00539008	0.00101107	0.00109734	0.00103043	0.00385201	0.00576781	0.00444024	0.004978	0.00632931	0.00455486	0.00585798	0.00558564	0.00438798	0.00664947	0.00679833	0.00710233	0.0083578	0.00436669	0.00423148	0.00379536	0.00248012	0.00603061	0.00517747	0.00458425
ko00930	0.00341367	0.00522956	0.00136835	0.00131957	0.00233755	0.00261773	0.00118706	0.00955025	0.0124405	0.0129703	0.00196951	0.00205284	0.00195992	0.00147176	0.00529141	0.00658185	2.45e-05	0.00013671	5.23e-05	0.00393306	0.00730531	0.00390966	0.00391561	0.00900922	0.0024383	0.00504896	0.00512049	0.00487123	0.00918812	0.00842654	0.0102271	0.0138061	0.00130977	0.00143008	0.00228629	0.00354455	0.0061202	0.00397105	0.00250469
ko02060	0.00367911	0.00036535	0.00730297	0.00869449	0.0104677	0.00943322	0.0076233	0.0029361	0.00261569	0.00231398	0.00527714	0.00415247	0.00486748	0.00462431	0.00580805	0.00309435	0.010339	0.0101995	0.0102144	0.00666528	0.00224485	0.00627901	0.00155562	0.00389716	0.00274481	0.00182059	0.00340907	0.00223665	0.00248989	0.00257496	0.00397257	0.00146875	0.00693431	0.006964	0.00835182	0.0080495	0.00201271	0.00368984	0.00468471
ko00908	0.00437786	0.00392098	0.00505472	0.00500136	0.00417496	0.00438782	0.00534766	0.00335805	0.00342413	0.00339947	0.00641204	0.00682113	0.0065388	0.00678542	0.00420925	0.00425664	0.00655316	0.00647358	0.0065026	0.00509827	0.0040615	0.00405587	0.00439792	0.00406878	0.00458621	0.00404097	0.00401175	0.00448586	0.00413195	0.00408811	0.00399438	0.00314425	0.00535593	0.0053077	0.00544641	0.00591208	0.00412542	0.00420865	0.00454354
ko00195	0.00279624	0.00391272	0.00490131	0.00259182	0	0.00444665	0.00541573	0.00351309	0.00328121	0.00351704	0.00516009	0.0055479	0.0056934	0.00469869	0.00461805	0.00501044	0	0	0	0.00487614	0.00415599	0.00423774	0	0	0.00510753	0.00447324	0.0037512	0.00371365	0.00448372	0.00447219	0.00455841	0.00381994	0.00507646	0.0050596	0.00441271	0.00321585	0.00423728	0.00423521	0.00448261
ko00591	0.00329412	0.00270014	0.00466234	0.00424364	0.00025497	0.00185245	0.00434464	0.00392897	0.00429838	0.00540035	0.00299794	0.00242352	0.00293268	0.00256104	0.00300814	0.00268654	0	0.00148947	0.00143746	0.00219456	0.00292248	0.00270947	0.00198187	0.00158593	0.00257256	0.00370627	0.00408914	0.00181975	0.00397852	0.00394663	0.00503772	0.00615053	0.00098544	0.00111837	0.00167411	0.00097789	0.00460782	0.00512074	0.00541277
ko00633	0.00208393	0.0006608	0.00375904	0.00466017	0.00535832	0.0030627	0.00431311	0.00370305	0.00332564	0.00282195	0.00136645	0.00153294	0.00136241	0.00138806	0.00377419	0.00289815	9.31e-05	0.00027944	0.0001601	0.00237663	0.00240663	0.00617632	0.00225463	0.00187743	0.00260802	0.00349788	0.00332558	0.00076944	0.00283979	0.00395455	0.00318432	0.00431252	0.00091477	0.00103339	0.00127029	0.00107912	0.00492743	0.00457275	0.00430187
ko02020	0.00422146	0.00386496	0.00385619	0.00451576	0.00807083	0.00591414	0.00384257	0.0051428	0.00425095	0.00416395	0.00317426	0.00313983	0.00311718	0.00312303	0.00446617	0.00479007	0.00264038	0.00273169	0.00263444	0.00414306	0.00340096	0.00488092	0.00546155	0.00610133	0.00485653	0.00438505	0.00488162	0.00301421	0.00352296	0.00346651	0.00347806	0.00387834	0.00421758	0.00420982	0.0043558	0.00304289	0.00447542	0.00539616	0.0046618
ko00680	0.00385703	0.00340265	0.00426041	0.00449437	0.00475049	0.00462807	0.00446342	0.00403594	0.00405277	0.00380109	0.00478693	0.0046976	0.00469497	0.00486277	0.00403736	0.00426183	0.00590827	0.00583012	0.00584226	0.00426193	0.00451708	0.00410043	0.00396569	0.00434702	0.0039503	0.00401552	0.00407273	0.00427871	0.00395821	0.00394695	0.00402909	0.00379603	0.00424825	0.00419205	0.00421979	0.0038145	0.00416584	0.0041184	0.00407354
ko00053	0.00287404	0.00335082	0.00203052	0.0024947	0.00552694	0.0033857	0.00195613	0.00455584	0.00452868	0.00377198	0.00363715	0.00336472	0.0035545	0.00334615	0.00436564	0.00400792	0.00433077	0.00422362	0.00426082	0.00424379	0.00469686	0.00413081	0.00304899	0.00347281	0.00299625	0.00350524	0.00353445	0.00336371	0.00320919	0.00327231	0.00383032	0.00404164	0.00427765	0.00400113	0.00495114	0.00176183	0.00381287	0.00357122	0.00295354
ko00625	0.00301897	0.00138463	0.00457247	0.00211473	0	0.00109637	0.0047244	0.00889442	0.00946974	0.00984223	0.00355707	0.00343244	0.00351401	0.00310753	0.00764877	0.00657675	0	0	0	0.00711516	0.00746507	0.00933674	0.00520573	0	0.00449871	0.00685295	0.00647941	0.00435123	0.00772541	0.00784986	0.00898576	0.01131	0.00559854	0.00581185	0.0059949	0.00723166	0.00843152	0.00689072	0.00576986
ko00903	0.00096483	0.00394398	0	0.00223923	0	0	0.00154553	0.00964811	0.0132804	0.0133818	0.00494284	0.0047222	0.00474086	0.00406273	0.00665847	0.00601506	0	0	0.00232913	0.00534646	0.00676054	0.0060662	0.00528846	0	0.0040825	0.00421331	0.00689785	0.00338268	0.00915802	0.0102602	0.0105902	0.0139606	0.0042309	0.00420953	0.00443148	0.00318547	0.00662557	0.00594801	0.00489907
ko00363	0.00023421	0.00084846	0	0.00197439	0	0	0.00203979	0.00727014	0.00974969	0.00918176	0.0032377	0.00304163	0.0032095	0.00301608	0.0031899	0.00425689	0	0	0.0014383	0.00397724	0.00468977	0.00426405	0.00216721	0	0.00317011	0.00416751	0.00581083	0.00203794	0.00785698	0.00854498	0.00964978	0.0105631	0.00132648	0.00157058	0.00226884	0.00130866	0.00605592	0.00621474	0.00546034
ko00362	0.00361641	0.00438693	0.00280102	0.00253516	0.0025442	0.00285108	0.0025318	0.00622067	0.00701009	0.00770336	0.00318616	0.00285022	0.00298996	0.00273853	0.00462663	0.00495842	0.0041163	0.00401828	0.00405811	0.00385479	0.00444791	0.00272205	0.00260698	0.00683943	0.00327727	0.00424914	0.00602325	0.00331907	0.00550266	0.00565954	0.00609267	0.0072786	0.00228142	0.00239825	0.00325973	0.0034975	0.00424488	0.0043025	0.00388232
ko00350	0.00455076	0.00521843	0.00398532	0.00372967	0.00452268	0.00434146	0.00363163	0.00620349	0.00578592	0.00537757	0.00374322	0.00355811	0.00358971	0.00339942	0.00486409	0.00513931	0.00423325	0.00421347	0.00419423	0.00471837	0.00480313	0.00491472	0.00453661	0.00544933	0.00395069	0.00508403	0.00532324	0.00515034	0.00528744	0.00498904	0.00543311	0.00606298	0.00296441	0.00293315	0.0038234	0.00509213	0.0048625	0.0045869	0.00431571
ko00623	0.00312633	0.00289832	0.00286065	0.00322586	0	0.00490206	0.00358451	0.00575835	0.00604081	0.00551142	0.00190319	0.00263432	0.00172483	0.00117937	0.00408739	0.00597722	0	0	0	0.00487878	0.00541658	0.00238498	0	0.0069722	0.00563445	0.00528182	0.00516641	0.00575865	0.00587758	0.00530484	0.00578734	0.00486771	0.00415905	0.00416616	0.00430336	0.00311344	0.004852	0.00466911	0.00453363
ko00980	0	0	0	0.00097173	0	0	0.00086962	0.00488636	0.00075879	0.00353193	0	0	0	0	0.00800645	0.00710934	0	0	0	0.0033034	0.00292789	0.00096841	0	0	0.00413029	0.00339474	0.00613268	0.00287516	0.00305031	0.00094595	0.00197116	0.0034538	0.00206099	0.00276602	0.00353933	0.00159063	0.0075986	0.00652078	0.00440065
ko00627	0.00270336	0.00328693	0.00237262	0.00186951	0.0028807	0.00232788	0.00221816	0.00480275	0.00540423	0.00560247	0.00313869	0.00274767	0.00296633	0.00265139	0.00388673	0.00385212	0.00434345	0.0042403	0.00428152	0.00333552	0.003885	0.00256843	0.00208003	0.00421497	0.00253113	0.00335283	0.00458452	0.00306304	0.00483018	0.00514192	0.00544439	0.00628026	0.00197819	0.00217853	0.0027688	0.00329248	0.00424464	0.00367777	0.00321886
ko00621	0.00167504	0.00065811	0.001784	0.00212444	0	0.00141189	0.00272365	0.0047707	0.0052001	0.00536703	0.0007873	0.00092779	0.00072224	0.00084721	0.00300397	0.00214438	0	0	1.03e-05	0.00434063	0.00190155	0.00311194	0.00127597	0.00291867	0.00286188	0.00212629	0.00360126	0.00073722	0.00382563	0.00386519	0.00516685	0.00619381	0.00257861	0.00269102	0.00412775	0.00594189	0.00210268	0.00266553	0.00241488
ko00253	0	0	0	0	0	0	0.00222105	0.0036356	0.00485221	0.00478227	0.00442857	0.00430314	0.00627277	0.00272582	0.00149853	0.00219339	0	0	0	0.00574543	0.00214785	0.00543898	0.00759288	0	0.00350974	0.00204141	0.00098967	0.0002321	0.00190165	0.00089227	0.00109688	0.00168428	0.00303124	0.00296889	0.00299733	0	0	0	0
ko00561	0.00388135	0.00382012	0.00385986	0.00422794	0.00478922	0.00437469	0.00417049	0.00474592	0.00478233	0.0046305	0.00453614	0.0042519	0.00442834	0.00446109	0.0044897	0.00431876	0.00571468	0.0056187	0.00564095	0.00495353	0.0046457	0.00634789	0.00411866	0.00473845	0.00376602	0.00402613	0.00399234	0.00440965	0.00435001	0.00446352	0.00458545	0.00430955	0.00636213	0.00633523	0.00571423	0.00616777	0.00403309	0.00401357	0.00386073
ko00121	0.00053653	0.00039554	9.25e-05	0.00126626	2.74e-06	0.00016637	0.00282781	0.00335605	0.00450577	0.00571641	0.00071276	0.00146664	0.00078736	0.00164459	0.00117818	0.00314898	0	2.8e-07	3.7e-07	0.00793513	0.00440196	0.00368123	0.00019438	0.00425401	0.0020809	0.0015192	0.00093743	0.00015154	0.00521585	0.00278228	0.00485029	0.00335072	0.0121171	0.0120385	0.0110577	0.0376893	0.00230239	0.00087133	0.00067406
ko00364	0.00160218	0.00217182	0.00087947	0.000345	0	0.00086429	0.00030307	0.00409232	0.00442711	0.00478241	7.51e-05	3.84e-05	0.00021574	0.00015545	0.0020433	0.00311007	0	0	0	0.00168524	0.00116568	0.00095861	0.002211	0.00403448	0.00195515	0.00144124	0.00262669	0.00043698	0.00199384	0.00199953	0.00219415	0.00347421	0.00064491	0.00071486	0.00125103	0.00035272	0.00246517	0.00166711	0.00152079
ko00472	0.00246321	0.00147673	0.00206026	0.00027489	1.42e-06	3.36e-05	0.00042243	0.00448569	0.00280675	0.00318898	0.00154022	0.0014958	0.00138527	0.00117146	0.00604685	0.005389	7.5e-07	2.04e-06	8.92e-06	0.00373695	0.00299693	0.00403128	0.00680608	0.00094083	0.0112927	0.0075923	0.00527052	0.00121753	0.00270288	0.00238844	0.0022492	0.00362881	0.0111421	0.0105716	0.00640663	0.00345432	0.00804854	0.00724578	0.00680372
ko00562	0.00188987	0.00187986	0.00160673	0.001965	0.00386806	0.0021231	0.00156906	0.00406671	0.0036228	0.00372798	0.00188483	0.00197799	0.00191281	0.00186118	0.00335325	0.0032851	0.00116128	0.00122399	0.00116525	0.00338207	0.00458103	0.00270525	0.00240379	0.00284728	0.00259133	0.00350048	0.00252586	0.00581094	0.00369451	0.00359977	0.0035179	0.00389982	0.00210055	0.00216863	0.00248938	0.00257268	0.00250056	0.00215023	0.00173228
ko00791	0.00131985	0.00222663	6.92e-05	0.0008572	0	0.000149	0.00122452	0.0026521	0.00368793	0.00351468	0.00041438	0.00023165	0.00033843	0.00035844	0.0032547	0.00236349	0	0	0	0.00187176	0.00211929	0.00691898	0	0	0.00135384	0.00278361	0.00235868	0.00041217	0.0022683	0.00221713	0.00228935	0.00371557	0.00432936	0.0041974	0.00342258	0.00152608	0.0028936	0.00273584	0.00151104
ko00361	0.0013666	0.00138783	0.00088444	0.0004869	0.00049471	0.00043892	0.00070971	0.00439968	0.00388539	0.00393791	0.00065102	0.00078245	0.00072482	0.0005718	0.00254886	0.00253134	5.7e-06	2.73e-05	1.02e-05	0.00222462	0.00196654	0.00264772	0.00229069	0.00268474	0.0020046	0.00243292	0.00314273	0.00145472	0.00346354	0.00322306	0.00392582	0.00592104	0.0009329	0.00102334	0.00150107	0.00231311	0.00266566	0.00210071	0.00168914
ko00622	0.00016689	0.00025971	0	0.00093923	0	0	0.00123657	0.00259103	0.00330359	0.00301956	0.00037224	0.00045408	0.00031327	0.00019056	0.00106159	0.00106953	0	0	0	0.00192922	0.00094657	0.00167753	0	0.00104964	0.00112939	0.00089311	0.00243931	0.00043764	0.00288346	0.00264884	0.00363704	0.00457971	0.00062161	0.00071064	0.00160022	0.00157334	0.00076391	0.00120876	0.00133344
ko00120	0.0001395	0.00013385	1.69e-05	0.00014114	3.1e-07	1.85e-05	0.00031474	0.00096272	0.00158839	0.00192728	0.00019541	0.00027731	0.00019753	0.00026479	0.00038239	0.00060486	0	3e-08	1.2e-07	0.00103914	0.00073794	0.00055621	7.74e-05	0.00077444	0.00037695	0.00059934	0.00057107	8.42e-05	0.001198	0.00084416	0.00119876	0.0013208	0.00139485	0.00139794	0.0012727	0.0042048	0.00053815	0.0006122	0.00035839
