# Supplementary material for: Microbiota plasticity in tilapia gut revealed by meta-analysis evaluating the effect of probiotics, prebiotics, and biofloc
Source: PeerJ. 2023 Oct 11;11:e16213. doi: 10.7717/peerj.16213 (PMC10576497; doi:10.7717/peerj.16213)
Supplement: Supplemental Information 10 [file peerj-11-16213-s010.xlsx]

## Sheet: core_microbiome
Phylum	Prevelance
Proteobacteria	0.948718
Firmicutes	0.74359
Actinobacteria	0.717949
Fusobacteria	0.692308
Bacteroidetes	0.615385
Planctomycetes	0.307692
Chloroflexi	0.230769
Chlamydiae	0.205128
Cyanobacteria	0.205128
Verrucomicrobia	0.179487
Spirochaetes	0.128205
Deinococcus_Thermus	0.102564
Acidobacteria	0.025641
Dependentiae	0.025641
Zixibacteria	0
Omnitrophicaeota	0
Unassigned	0
Latescibacteria	0
Dadabacteria	0
Nitrospirae	0
Armatimonadetes	0
Halanaerobiaeota	0
Elusimicrobia	0
Gemmatimonadetes	0
WPS_2	0
Kiritimatiellaeota	0
Thaumarchaeota	0
Deferribacteres	0
Rokubacteria	0
Synergistetes	0
Epsilonbacteraeota	0
Patescibacteria	0
Tenericutes	0
