# Supplementary material for: Microbiota plasticity in tilapia gut revealed by meta-analysis evaluating the effect of probiotics, prebiotics, and biofloc
Source: PeerJ. 2023 Oct 11;11:e16213. doi: 10.7717/peerj.16213 (PMC10576497; doi:10.7717/peerj.16213)
Supplement: Supplemental Information 11 [file peerj-11-16213-s011.xlsx]

## Sheet: correlation_table (4)
Taxon1	Taxon2	Correlation	P.value	Method
Bacteroidetes	Actinobacteria	-0.474529	3e-10	secom_pearson2
Chloroflexi	Actinobacteria	-0.366121	9.32e-06	secom_pearson2
Fusobacteria	Actinobacteria	-0.321028	7.91e-06	secom_pearson2
Planctomycetes	Actinobacteria	-0.318045	8.65e-05	secom_pearson2
Proteobacteria	Actinobacteria	0.282918	4.71e-05	secom_pearson2
Actinobacteria	Bacteroidetes	-0.474529	3e-10	secom_pearson2
Chloroflexi	Bacteroidetes	0.306933	0.000685676	secom_pearson2
Fusobacteria	Bacteroidetes	0.191728	0.015151	secom_pearson2
Planctomycetes	Bacteroidetes	0.320387	0.000682874	secom_pearson2
Proteobacteria	Bacteroidetes	-0.227409	0.00340653	secom_pearson2
Verrucomicrobia	Bacteroidetes	-0.210385	0.0288546	secom_pearson2
Actinobacteria	Chloroflexi	-0.366121	9.32e-06	secom_pearson2
Bacteroidetes	Chloroflexi	0.306933	0.000685676	secom_pearson2
Firmicutes	Chloroflexi	0.181928	0.0320773	secom_pearson2
Fusobacteria	Chloroflexi	0.271736	0.00131766	secom_pearson2
Planctomycetes	Chloroflexi	0.424371	1.68e-06	secom_pearson2
Proteobacteria	Chloroflexi	-0.553535	1.58e-12	secom_pearson2
Chloroflexi	Firmicutes	0.181928	0.0320773	secom_pearson2
Fusobacteria	Firmicutes	-0.297238	3.61e-05	secom_pearson2
Planctomycetes	Firmicutes	-0.256918	0.00168211	secom_pearson2
Proteobacteria	Firmicutes	-0.324412	2.48e-06	secom_pearson2
Verrucomicrobia	Firmicutes	-0.487051	1.11e-08	secom_pearson2
Actinobacteria	Fusobacteria	-0.321028	7.91e-06	secom_pearson2
Bacteroidetes	Fusobacteria	0.191728	0.015151	secom_pearson2
Chloroflexi	Fusobacteria	0.271736	0.00131766	secom_pearson2
Firmicutes	Fusobacteria	-0.297238	3.61e-05	secom_pearson2
Actinobacteria	Planctomycetes	-0.318045	8.65e-05	secom_pearson2
Bacteroidetes	Planctomycetes	0.320387	0.000682874	secom_pearson2
Chloroflexi	Planctomycetes	0.424371	1.68e-06	secom_pearson2
Firmicutes	Planctomycetes	-0.256918	0.00168211	secom_pearson2
Proteobacteria	Planctomycetes	-0.325706	5.68e-05	secom_pearson2
Actinobacteria	Proteobacteria	0.282918	4.71e-05	secom_pearson2
Bacteroidetes	Proteobacteria	-0.227409	0.00340653	secom_pearson2
Chloroflexi	Proteobacteria	-0.553535	1.58e-12	secom_pearson2
Firmicutes	Proteobacteria	-0.324412	2.48e-06	secom_pearson2
Planctomycetes	Proteobacteria	-0.325706	5.68e-05	secom_pearson2
Verrucomicrobia	Proteobacteria	0.361287	3.75e-05	secom_pearson2
Bacteroidetes	Verrucomicrobia	-0.210385	0.0288546	secom_pearson2
Firmicutes	Verrucomicrobia	-0.487051	1.11e-08	secom_pearson2
Proteobacteria	Verrucomicrobia	0.361287	3.75e-05	secom_pearson2
